# Supplementary material for: Dual emission of ESIPT-capable 2-(2-hydroxyphenyl)-4-(1H-pyrazol-1-yl)pyrimidines: interplay of fluorescence and phosphorescence
Source: Royal Society of Chemistry journal article supplement (doi:10.1039/d3nj00570d), 2023-01-01
Supplement: d3nj00570d1.pdf [file d3nj00570d1.pdf]

*Electronic Supplementary Information*

## **Dual emission of ESIPT-capable 2-(2-hydroxyphenyl)-4-(1H-pyrazol-1-yl)pyrimidines: interplay of fluorescence and phosphorescence**

Nikita A. Shekhovtsov,<sup>\*a</sup> Elena B. Nikolaenkova,<sup>b</sup> Alexey A. Ryadun,<sup>a</sup> Sofia N. Vorobyeva,<sup>a</sup> Viktor P. Krivopalov<sup>b</sup> and Mark B. Bushuev<sup>\*a</sup>

<sup>a</sup> *Nikolaev Institute of Inorganic Chemistry, Siberian Branch of Russian Academy of Sciences, 3, Acad. Lavrentiev Ave., Novosibirsk, 630090, Russia. E-mail addresses: shekhovtsov@niic.nsc.ru (Nikita A. Shekhovtsov), bushuev@niic.nsc.ru (Mark B. Bushuev). Fax: +7 383 330 94 89; Tel: +7 383 316 51 43.*

<sup>b</sup> *N. N. Vorozhtsov Novosibirsk Institute of Organic Chemistry, Siberian Branch of Russian Academy of Sciences, 9, Acad. Lavrentiev Ave., Novosibirsk, 630090, Russia.*

## Table of Contents

|                                            |    |
|--------------------------------------------|----|
| NMR and IR spectral data.....              | 3  |
| Figure S1.....                             | 3  |
| Figure S2.....                             | 4  |
| Figure S3.....                             | 4  |
| Figure S4.....                             | 5  |
| Figure S5.....                             | 6  |
| Figure S6.....                             | 7  |
| Structural data.....                       | 8  |
| Table S1.....                              | 8  |
| Table S2.....                              | 9  |
| Table S3.....                              | 10 |
| Figure S7.....                             | 12 |
| Figure S8.....                             | 12 |
| Figure S9.....                             | 12 |
| Figure S10.....                            | 13 |
| Figure S11.....                            | 13 |
| Figure S12.....                            | 13 |
| Photophysical and computational data ..... | 14 |
| Figure S13.....                            | 14 |
| Figure S14.....                            | 15 |
| Figure S15.....                            | 16 |
| Figure S16.....                            | 17 |
| Figure S17.....                            | 17 |
| Table S4.....                              | 18 |
| Table S5.....                              | 19 |
| Table S6.....                              | 20 |
| Table S7.....                              | 21 |
| Table S8.....                              | 22 |
| Table S9.....                              | 23 |
| Table S10.....                             | 24 |
| Table S11.....                             | 25 |
| Table S12.....                             | 26 |
| Table S13.....                             | 27 |
| Table S14.....                             | 29 |
| Table S15.....                             | 30 |
| Table S16.....                             | 31 |

NMR and IR spectral data

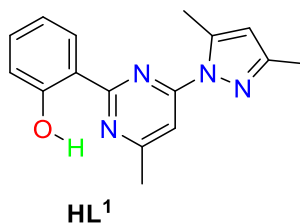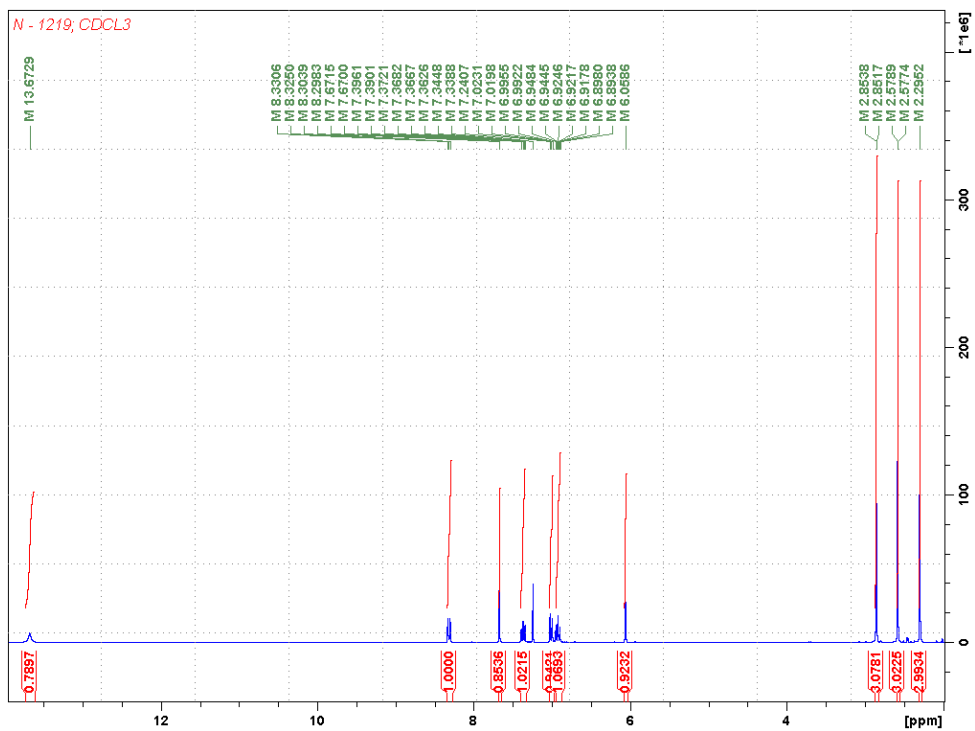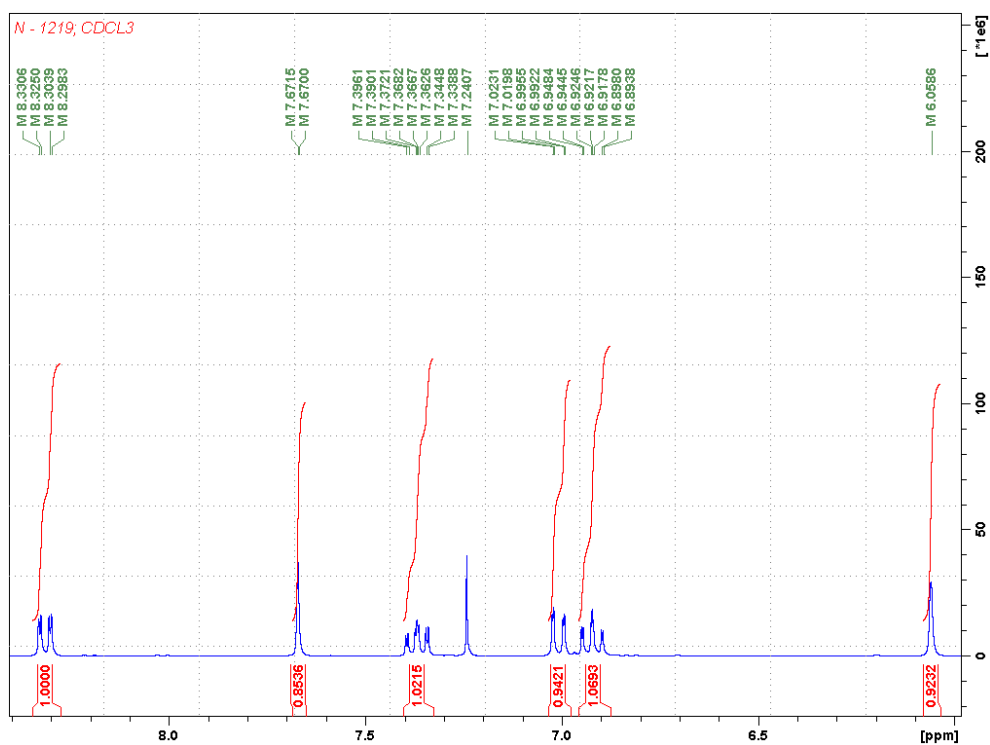

**Figure S1.** <sup>1</sup>H NMR spectrum of 2-(2-hydroxyphenyl)-4-(3,5-dimethyl-1H-pyrazol-1-yl)-6-methylpyrimidine (**HL<sup>1</sup>**).

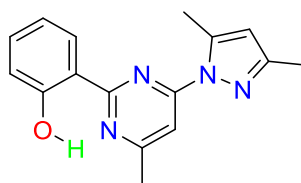

HL<sup>1</sup>

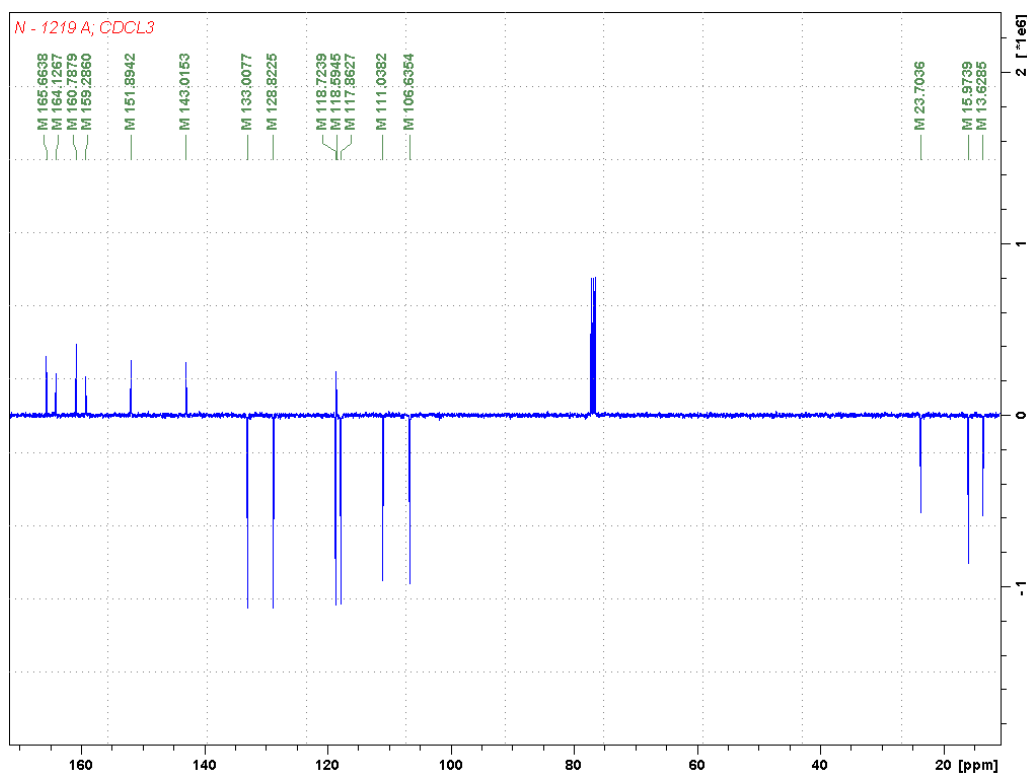

**Figure S2.** <sup>13</sup>C NMR spectrum of 2-(2-hydroxyphenyl)-4-(3,5-dimethyl-1H-pyrazol-1-yl)-6-methylpyrimidine (HL<sup>1</sup>).

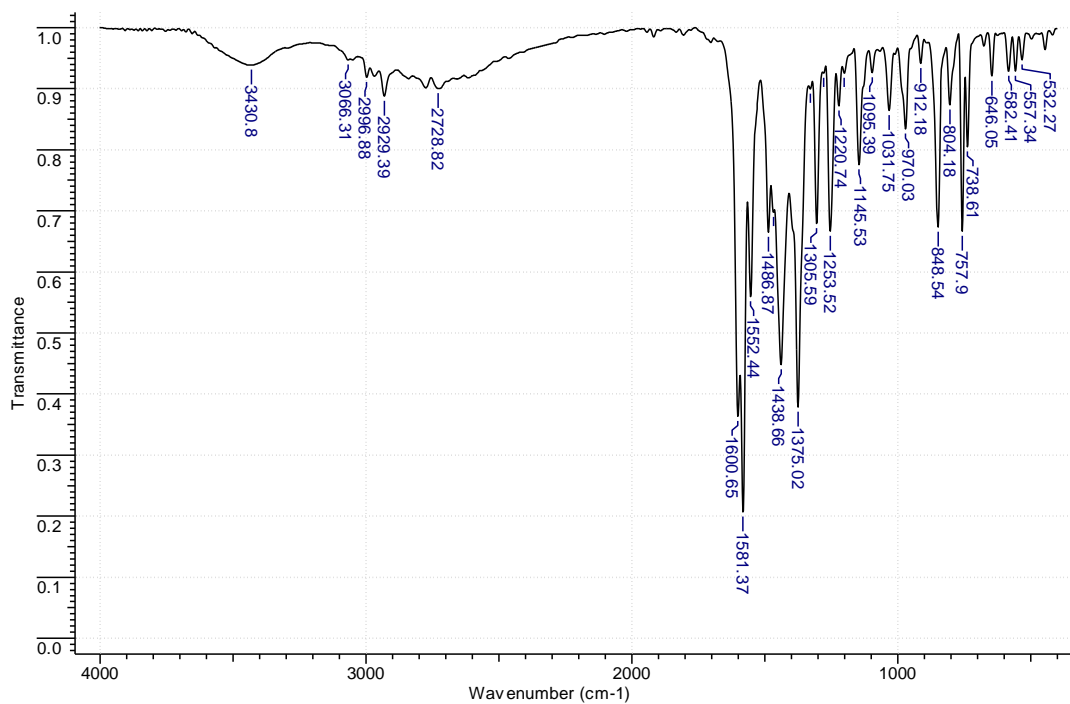

**Figure S3.** IR spectrum of 2-(2-hydroxyphenyl)-4-(3,5-dimethyl-1H-pyrazol-1-yl)-6-methylpyrimidine (HL<sup>1</sup>).

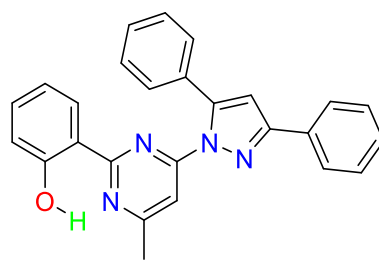

**HL<sup>2</sup>**

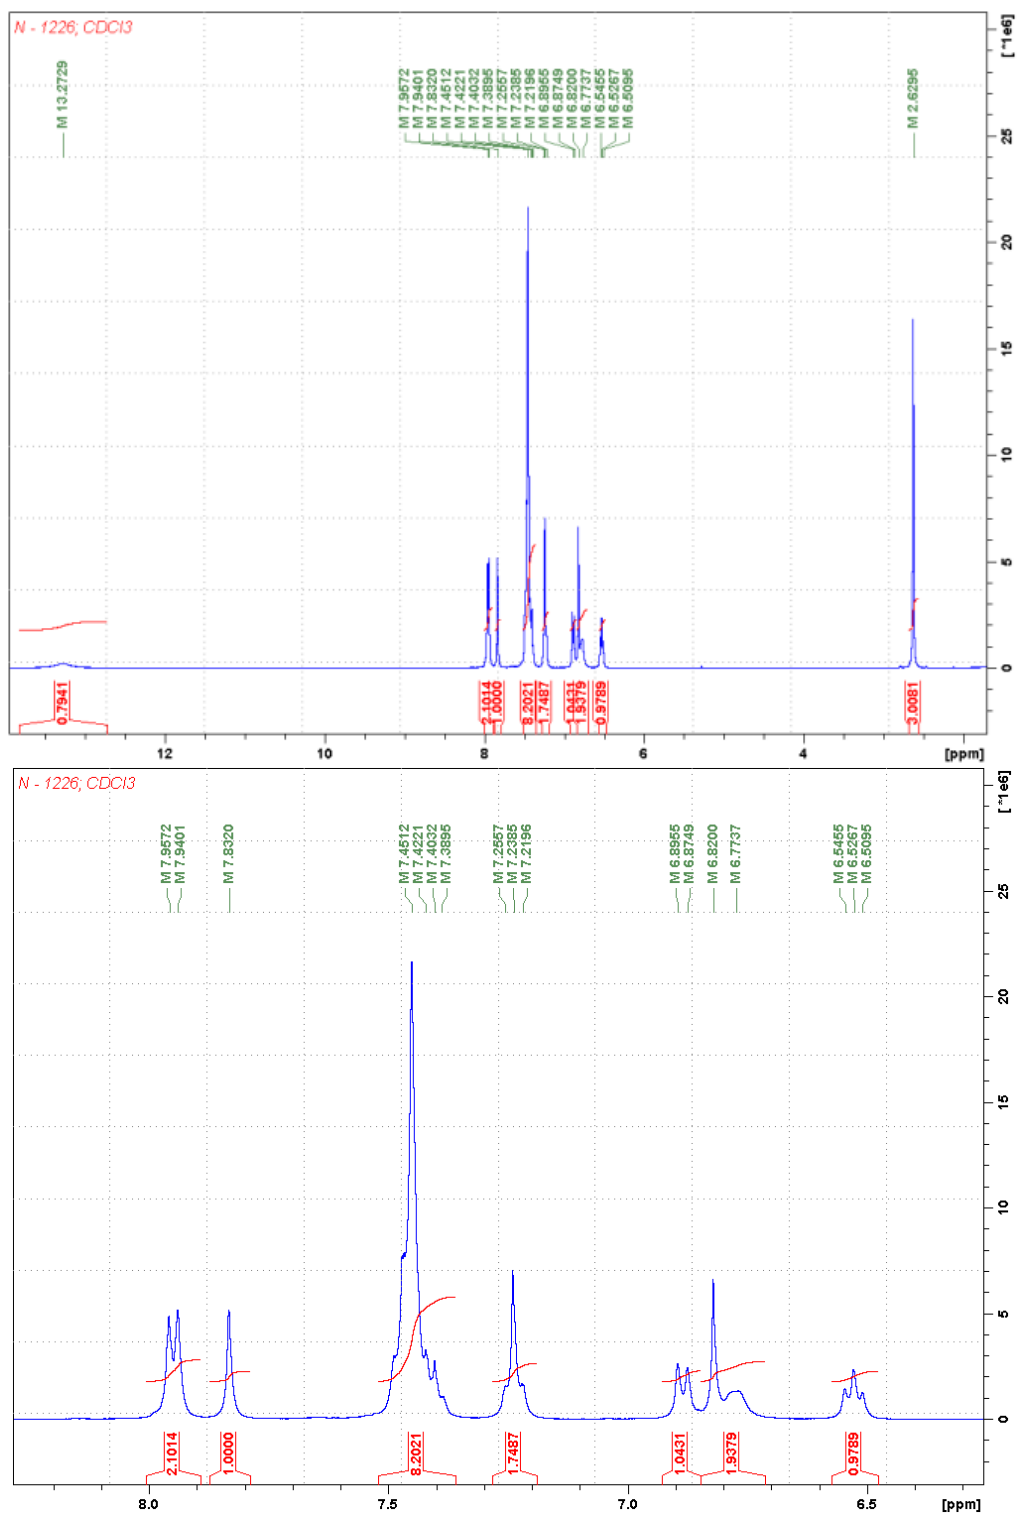

**Figure S4.** <sup>1</sup>H NMR spectrum of 2-(2-hydroxyphenyl)-4-(3,5-diphenyl-1H-pyrazol-1-yl)-6-methylpyrimidine (**HL<sup>2</sup>**).

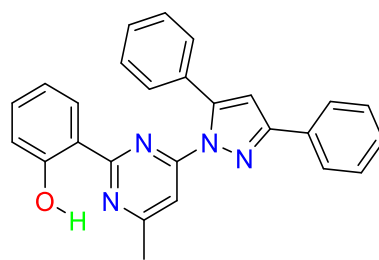

HL<sup>2</sup>

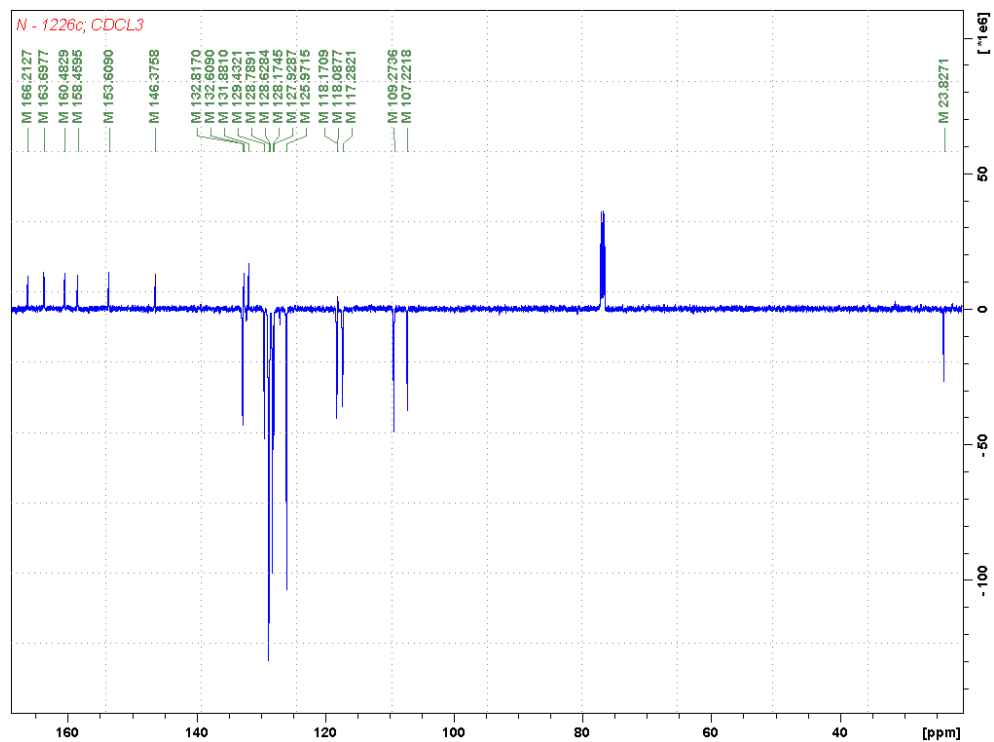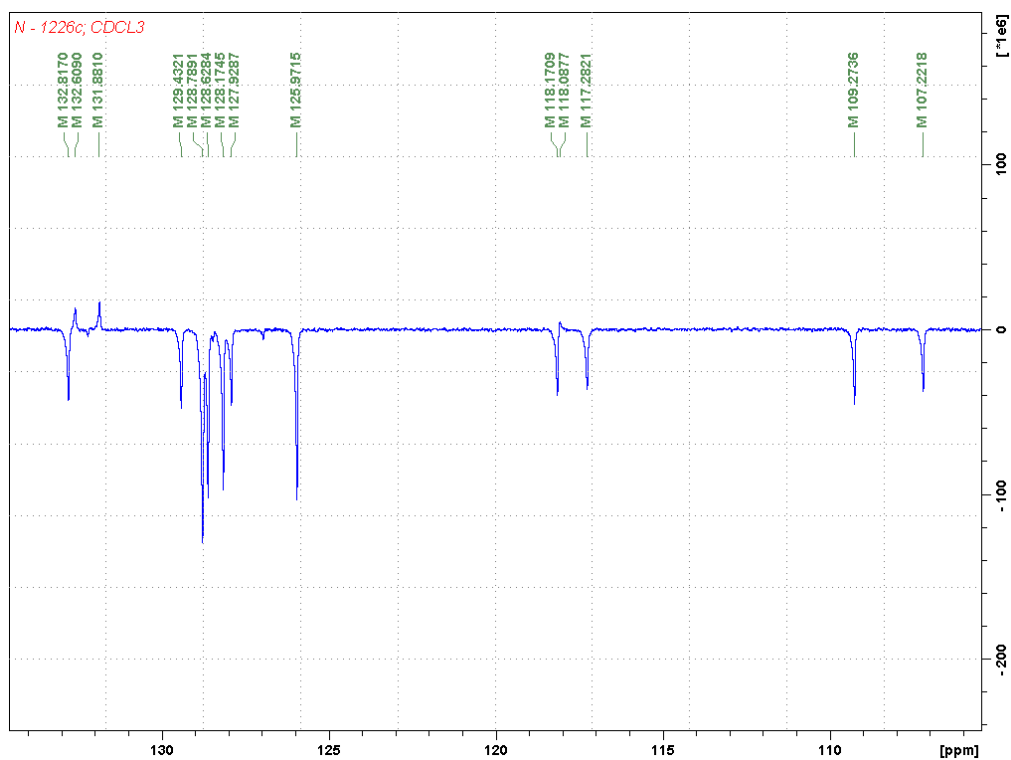

**Figure S5.** <sup>13</sup>C NMR spectrum of 2-(2-hydroxyphenyl)-4-(3,5-diphenyl-1H-pyrazol-1-yl)-6-methylpyrimidine (HL<sup>2</sup>).

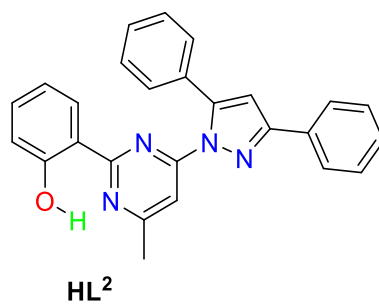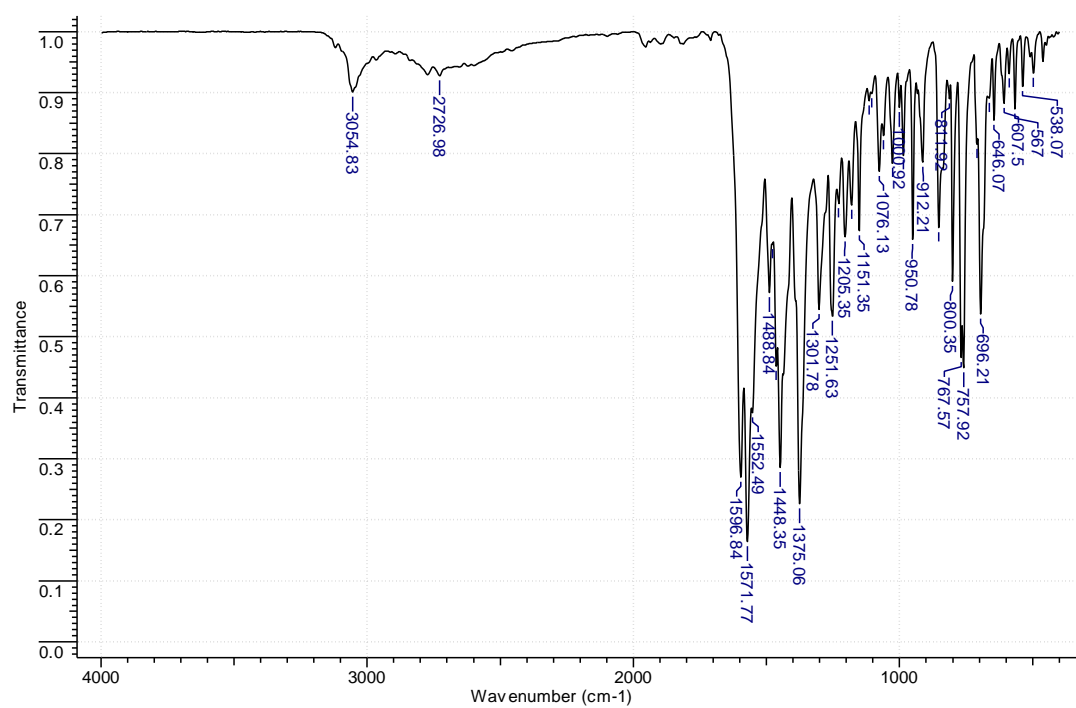

Figure S6. IR spectrum of 2-(2-hydroxyphenyl)-4-(3,5-diphenyl-1H-pyrazol-1-yl)-6-methylpyrimidine (HL<sup>2</sup>).

## Structural data

**Table S1.** Crystal data and structure refinement for **HL<sup>1</sup>** and **HL<sup>2</sup>**.

| Complex                                         | <b>HL<sup>1</sup></b>                             | <b>HL<sup>2</sup></b>                             |
|-------------------------------------------------|---------------------------------------------------|---------------------------------------------------|
| Empirical formula                               | C <sub>16</sub> H <sub>16</sub> N <sub>4</sub> O  | C <sub>26</sub> H <sub>20</sub> N <sub>4</sub> O  |
| Formula weight                                  | 280.33                                            | 404.46                                            |
| Crystal system                                  | monoclinic                                        | triclinic                                         |
| Space group, Z                                  | P2 <sub>1</sub> /n, 4                             | P-1, 2                                            |
| a(Å)                                            | 15.0005(5)                                        | 10.0306(9)                                        |
| b(Å)                                            | 5.2660(2)                                         | 10.1285(9)                                        |
| c(Å)                                            | 18.7118(7)                                        | 12.2622(10)                                       |
| α/°                                             | 90                                                | 94.126(3)                                         |
| β/°                                             | 113.3110(10)                                      | 113.697(3)                                        |
| γ/°                                             | 90                                                | 109.740(3)                                        |
| V(Å <sup>3</sup> )                              | 1357.44(9)                                        | 1042.06(16)                                       |
| dCalc(g/cm <sup>3</sup> )                       | 1.372                                             | 1.289                                             |
| μ/mm <sup>-1</sup>                              | 0.090                                             | 0.081                                             |
| F(000)                                          | 592.0                                             | 424.0                                             |
| Crystal size (mm)                               | 0.160 × 0.100 × 0.050                             | 0.080 × 0.080 × 0.030                             |
| 2θ range for data collection/°                  | 4.462 - 61.042                                    | 3.738 - 52.808                                    |
| Index ranges                                    | -21 ≤ h ≤ 21<br>-7 ≤ k ≤ 7<br>-26 ≤ l ≤ 26        | -12 ≤ h ≤ 12<br>-12 ≤ k ≤ 12<br>-15 ≤ l ≤ 15      |
| Reflections collected                           | 17280                                             | 20705                                             |
| Independent reflections (R <sub>int</sub> )     | 4138 [R <sub>int</sub> = 0.0616]                  | 4276 [R <sub>int</sub> = 0.0352]                  |
| Completeness to theta = 50.5°                   | 99.9 %                                            | 99.9 %                                            |
| Data / restraints / parameters                  | 4138/0/194                                        | 4276/0/282                                        |
| Goodness-of-fit on F <sup>2</sup>               | 1.042                                             | 1.029                                             |
| Final R indices (I ≥ 2σ (I))                    | R <sub>1</sub> = 0.0586, wR <sub>2</sub> = 0.1410 | R <sub>1</sub> = 0.0451, wR <sub>2</sub> = 0.1172 |
| R indices (all data)                            | R <sub>1</sub> = 0.0990, wR <sub>2</sub> = 0.1648 | R <sub>1</sub> = 0.0689, wR <sub>2</sub> = 0.1327 |
| Largest diff. peak and hole (e/Å <sup>3</sup> ) | 0.32/-0.27                                        | 0.13/-0.20                                        |



**Table S2.** Bond lengths and angles in the structure of **HL**<sup>1</sup>.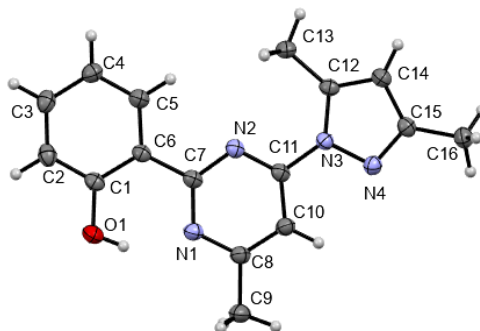

| Distance | <i>d</i> , Å | Angle       | ω          |
|----------|--------------|-------------|------------|
| O1–C1    | 1.353(2)     | C11–N2–C7   | 116.52(15) |
| N2–C11   | 1.323(2)     | N4–N3–C11   | 117.86(14) |
| N2–C7    | 1.341(2)     | N4–N3–C12   | 111.94(13) |
| N3–N4    | 1.3820(19)   | C12–N3–C11  | 130.20(15) |
| N3–C11   | 1.400(2)     | C15–N4–N3   | 104.71(14) |
| N3–C12   | 1.382(2)     | C7–N1–C8    | 117.31(15) |
| N4–C15   | 1.320(2)     | N2–C11–N3   | 116.83(15) |
| N1–C7    | 1.350(2)     | N2–C11–C10  | 122.97(16) |
| N1–C8    | 1.351(2)     | C10–C11–N3  | 120.20(16) |
| C11–C10  | 1.395(2)     | N3–C12–C13  | 126.23(15) |
| C12–C14  | 1.366(2)     | C14–C12–N3  | 105.29(15) |
| C12–C13  | 1.482(2)     | C14–C12–C13 | 128.47(16) |
| C7–C6    | 1.475(2)     | N2–C7–N1    | 124.97(16) |
| C5–C6    | 1.401(2)     | N2–C7–C6    | 117.53(15) |
| C5–C4    | 1.379(3)     | N1–C7–C6    | 117.50(15) |
| C1–C6    | 1.411(2)     | C4–C5–C6    | 121.52(17) |
| C1–C2    | 1.395(3)     | O1–C1–C6    | 122.93(16) |
| C15–C14  | 1.416(2)     | O1–C1–C2    | 117.29(16) |
| C15–C16  | 1.494(2)     | C2–C1–C6    | 119.78(16) |
| C8–C10   | 1.372(2)     | N4–C15–C14  | 111.25(16) |
| C8–C9    | 1.498(2)     | N4–C15–C16  | 120.86(16) |
| C3–C4    | 1.394(3)     | C14–C15–C16 | 127.89(16) |
| C3–C2    | 1.377(3)     | C5–C6–C7    | 119.49(15) |
|          |              | C5–C6–C1    | 118.31(16) |
|          |              | C1–C6–C7    | 122.20(15) |
|          |              | C12–C14–C15 | 106.81(15) |
|          |              | N1–C8–C10   | 121.16(15) |
|          |              | N1–C8–C9    | 116.16(16) |
|          |              | C10–C8–C9   | 122.68(16) |
|          |              | C8–C10–C11  | 117.04(16) |
|          |              | C2–C3–C4    | 120.42(17) |
|          |              | C5–C4–C3    | 119.41(17) |
|          |              | C3–C2–C1    | 120.55(17) |

**Table S3.** Bond lengths and angles in the structure of **HL<sup>2</sup>**.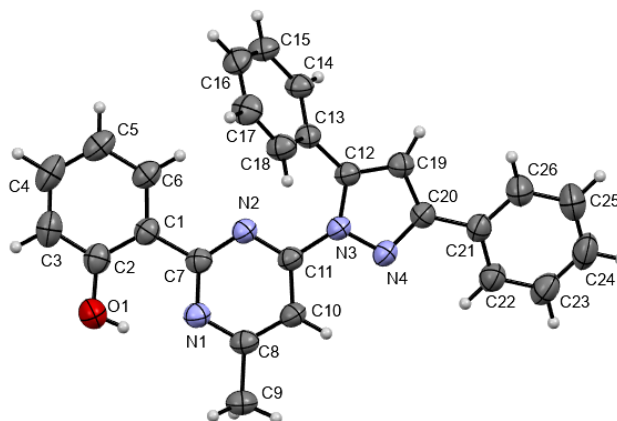

| Distance | <i>d</i> , Å | Angle       | ω          |
|----------|--------------|-------------|------------|
| N2–C11   | 1.3246(18)   | C11–N2–C7   | 115.98(13) |
| N2–C7    | 1.3436(19)   | N4–N3–C11   | 116.93(11) |
| O1–C2    | 1.353(2)     | N4–N3–C12   | 111.67(12) |
| N3–N4    | 1.3725(16)   | C12–N3–C11  | 131.08(12) |
| N3–C11   | 1.4077(19)   | C7–N1–C8    | 117.90(13) |
| N3–C12   | 1.3842(18)   | C20–N4–N3   | 105.03(12) |
| N1–C7    | 1.3426(18)   | N2–C11–N3   | 116.60(12) |
| N1–C8    | 1.3466(19)   | N2–C11–C10  | 123.46(14) |
| N4–C20   | 1.3259(19)   | C10–C11–N3  | 119.94(13) |
| C11–C10  | 1.3872(19)   | N2–C7–C1    | 117.42(13) |
| C12–C19  | 1.358(2)     | N1–C7–N2    | 124.85(14) |
| C1–C6    | 1.400(2)     | N1–C7–C1    | 117.73(14) |
| C1–C2    | 1.407(2)     | N4–C20–C21  | 120.36(13) |
| C21–C22  | 1.391(2)     | N4–C20–C19  | 110.77(13) |
| C21–C26  | 1.380(2)     | C19–C20–C21 | 128.86(14) |
| C14–C15  | 1.381(2)     | C14–C13–C12 | 119.32(14) |
| C6–C5    | 1.377(2)     | C14–C13–C18 | 118.75(14) |
| C22–C23  | 1.376(2)     | C18–C13–C12 | 121.80(13) |
| C18–C17  | 1.377(2)     | N1–C8–C10   | 120.85(14) |
| C2–C3    | 1.393(2)     | N1–C8–C9    | 117.14(14) |
| C7–C1    | 1.473(2)     | C10–C8–C9   | 122.01(14) |
| C20–C21  | 1.473(2)     | N3–C12–C13  | 126.07(13) |
| C20–C19  | 1.412(2)     | C19–C12–N3  | 105.50(13) |
| C13–C12  | 1.477(2)     | C19–C12–C13 | 128.22(13) |
| C13–C14  | 1.386(2)     | C6–C1–C7    | 119.71(14) |
| C13–C18  | 1.394(2)     | C6–C1–C2    | 118.44(15) |
| C8–C10   | 1.373(2)     | C2–C1–C7    | 121.85(14) |
| C8–C9    | 1.495(2)     | C8–C10–C11  | 116.92(14) |
| C15–C16  | 1.370(2)     | C22–C21–C20 | 121.29(14) |
| C16–C17  | 1.382(2)     | C26–C21–C20 | 120.34(15) |
| C5–C4    | 1.382(3)     | C26–C21–C22 | 118.36(16) |
| C3–C4    | 1.373(3)     | C15–C14–C13 | 120.72(15) |
| C23–C24  | 1.370(3)     | C12–C19–C20 | 107.03(13) |
| C26–C25  | 1.382(3)     | C5–C6–C1    | 121.35(17) |

|         |          |              |            |
|---------|----------|--------------|------------|
| C24-C25 | 1.374(3) | C23-C22 -C21 | 120.82(17) |
|         |          | C17-C18 -C13 | 119.96(15) |
|         |          | O1-C2 -C1    | 123.21(15) |
|         |          | O1-C2 -C3    | 117.31(16) |
|         |          | C3-C2 -C1    | 119.48(16) |
|         |          | C16-C15 -C14 | 120.21(15) |
|         |          | C15-C16 -C17 | 119.60(15) |
|         |          | C18-C17 -C16 | 120.71(16) |
|         |          | C6-C5 -C4    | 119.46(18) |
|         |          | C4-C3 -C2    | 120.60(18) |
|         |          | C24-C23 -C22 | 120.25(18) |
|         |          | C3-C4 -C5    | 120.65(17) |
|         |          | C21-C26 -C25 | 120.43(18) |
|         |          | C23-C24 -C25 | 119.59(18) |
|         |          | C24-C25 -C26 | 120.54(19) |

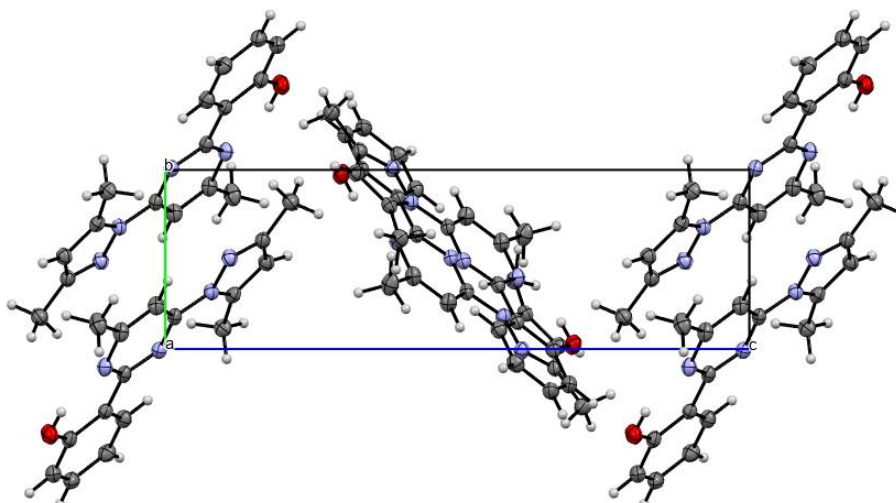

**Figure S7.** Packing of HL<sup>1</sup> (view along the *a* axis).

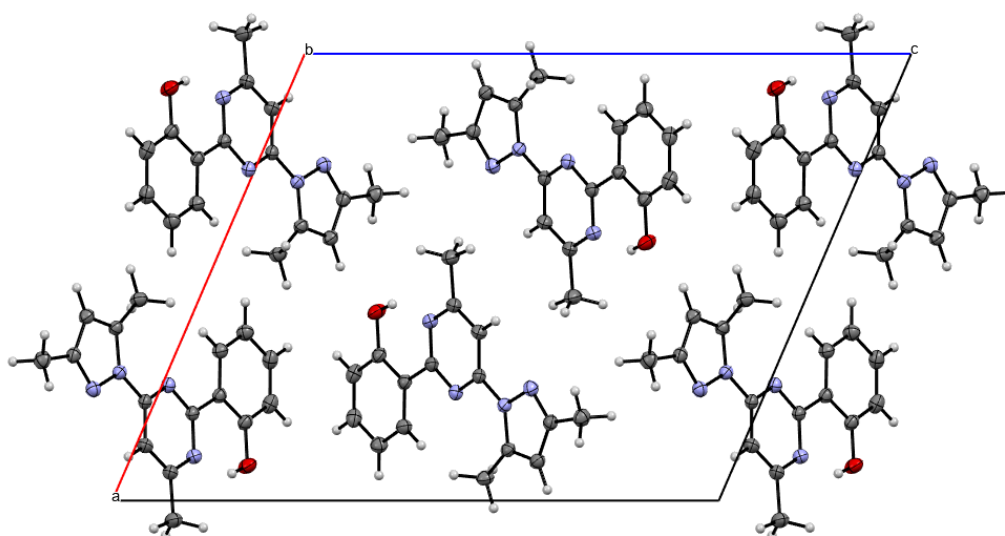

**Figure S8.** Packing of HL<sup>1</sup> (view along the *b* axis).

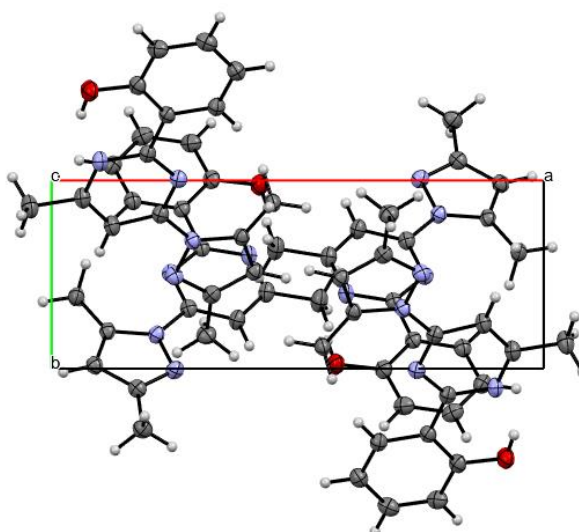

**Figure S9.** Packing of HL<sup>1</sup> (view along the *c* axis).

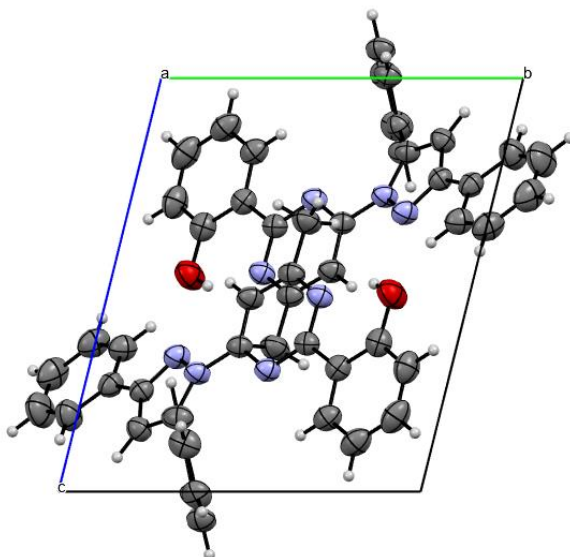

**Figure S10.** Packing of HL<sup>2</sup> (view along the *a* axis).

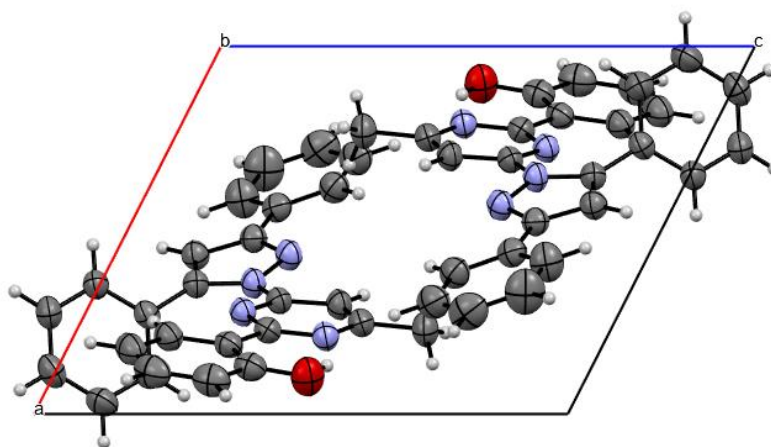

**Figure S11.** Packing of HL<sup>2</sup> (view along the *b* axis).

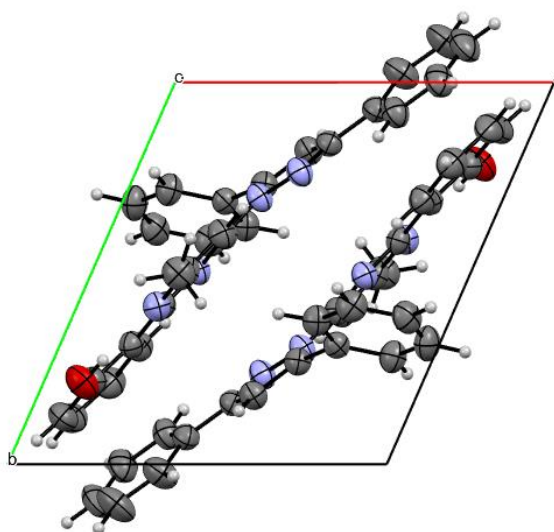

**Figure S12.** Packing of HL<sup>2</sup> (view along the *c* axis).

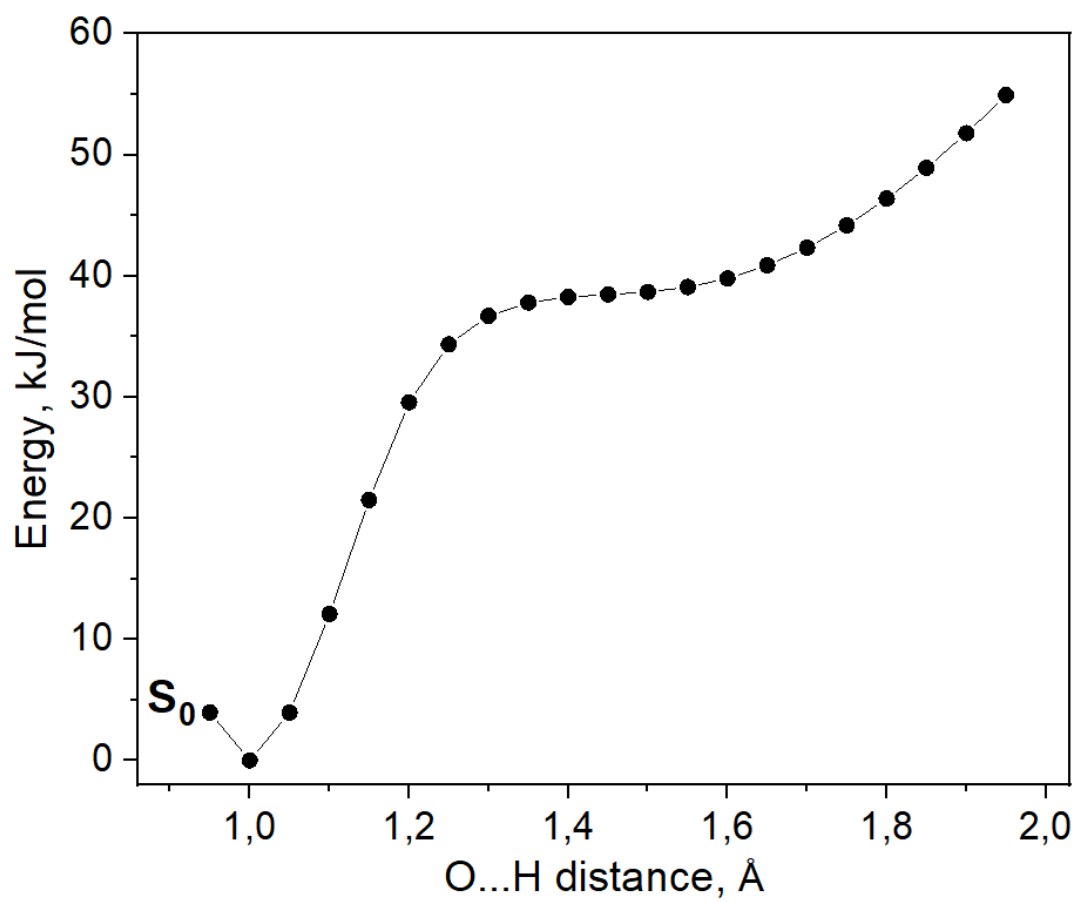

**Figure S13.** The potential energy curve of the ground state of HL<sup>2</sup>.

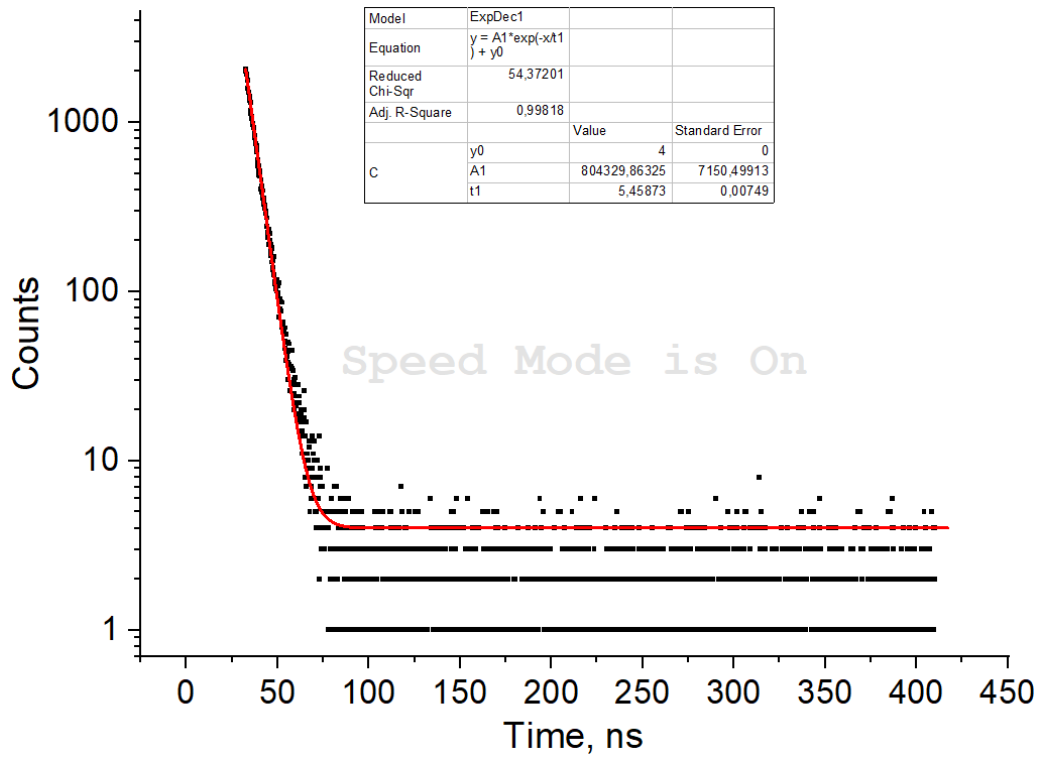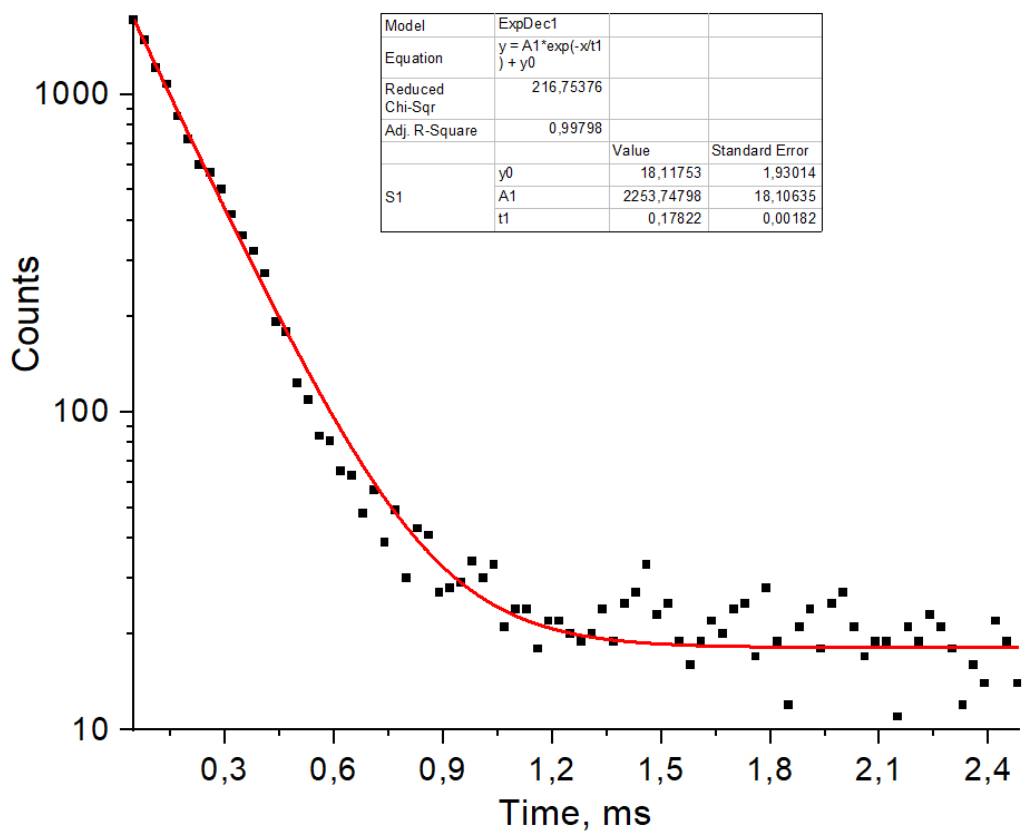

Figure S14. Photoluminescence decay curves for HL<sup>1</sup>.

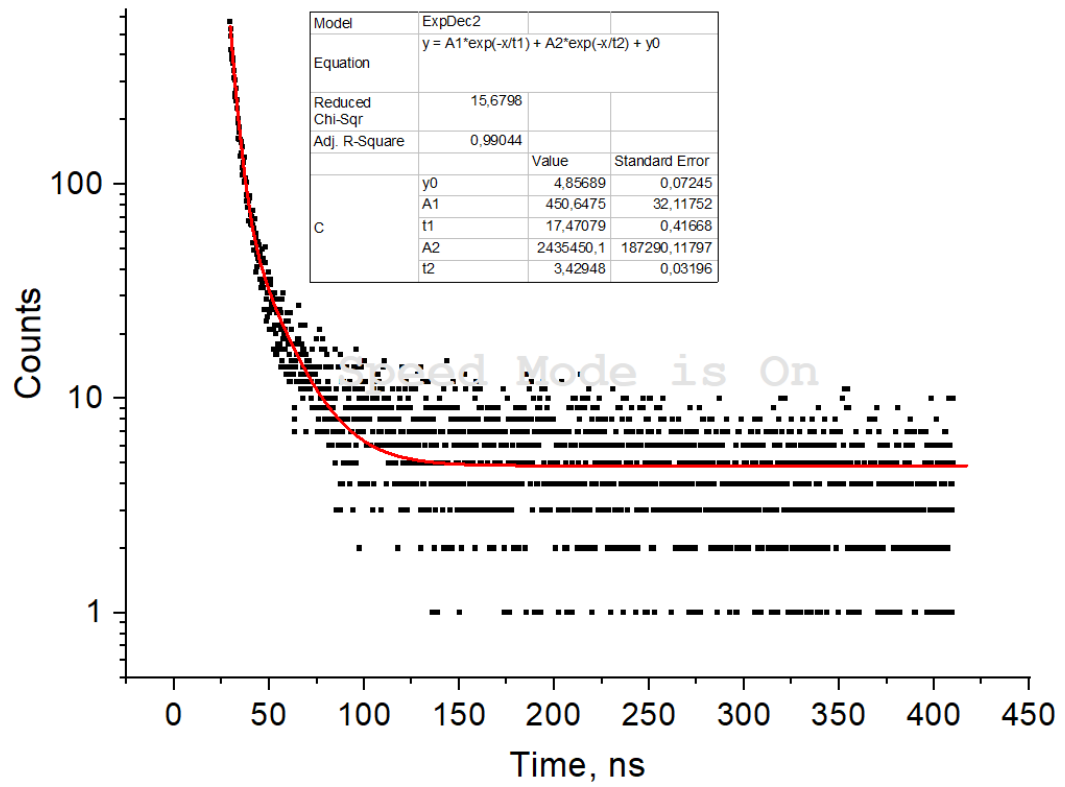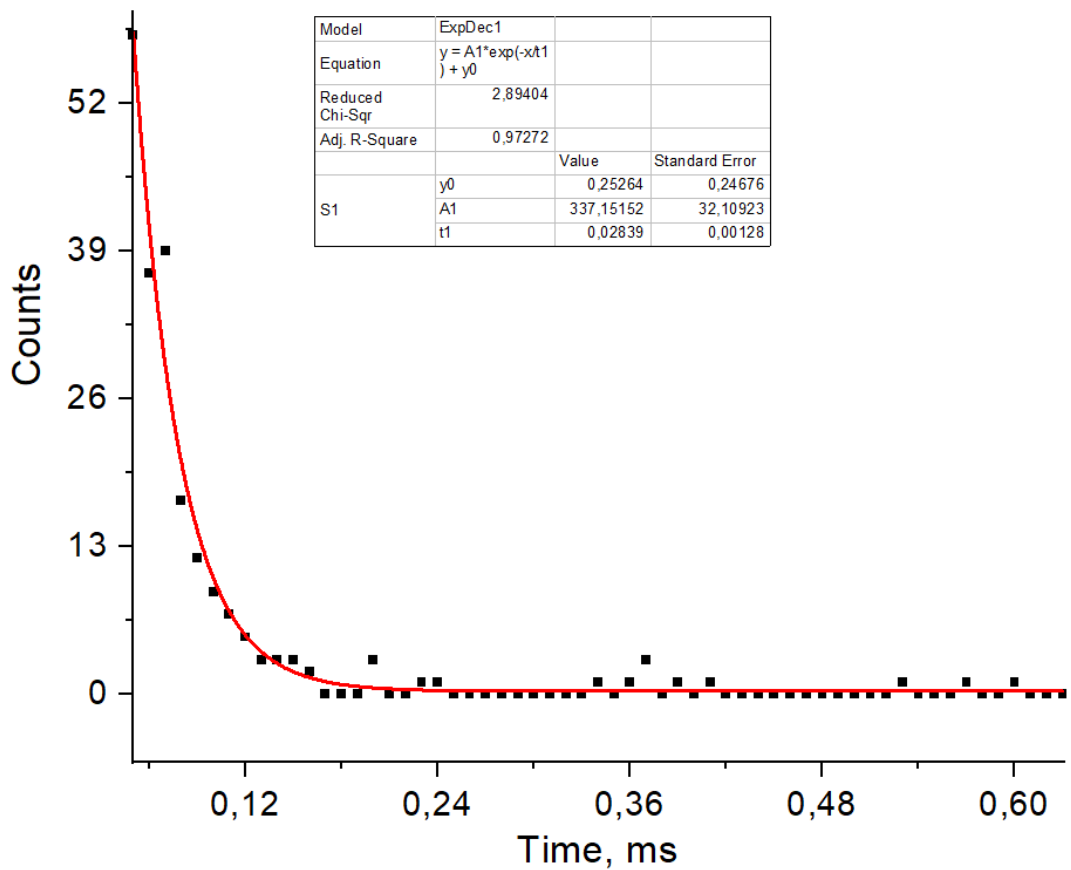

Figure S15. Photoluminescence decay curves for HL<sup>2</sup>.



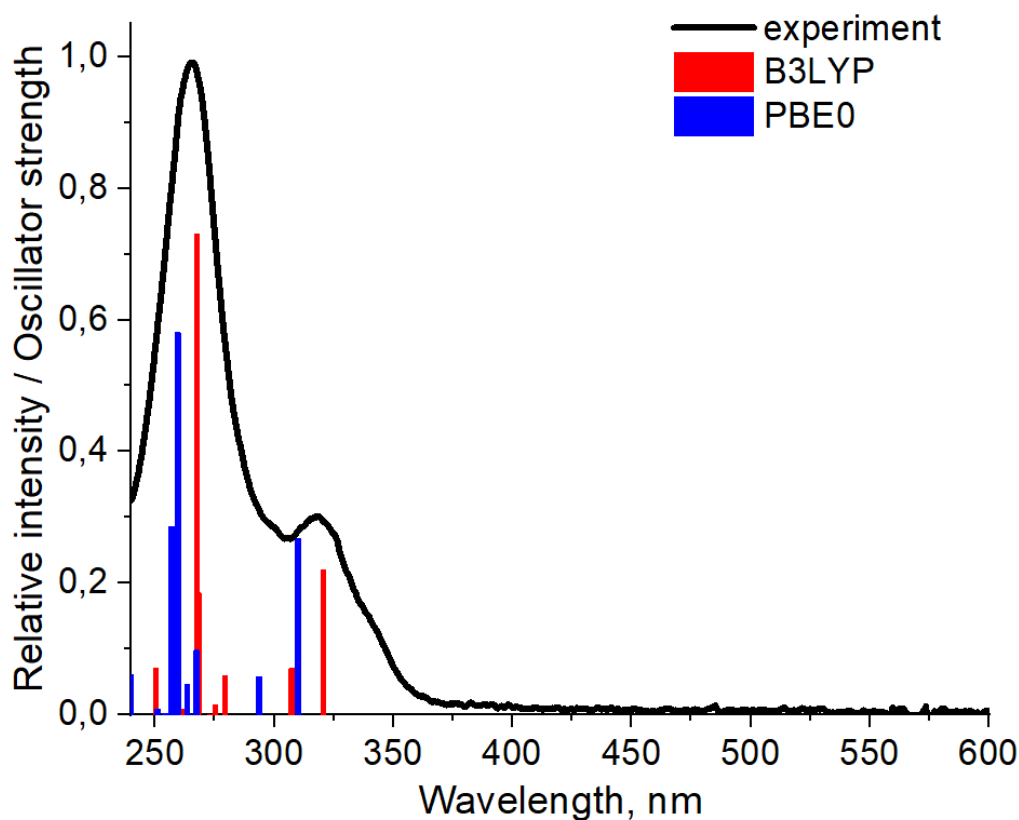

**Figure S16.** Comparison of the experimental absorption spectrum of  $HL^1$  with those computed using PBE0 and B3LYP functionals.

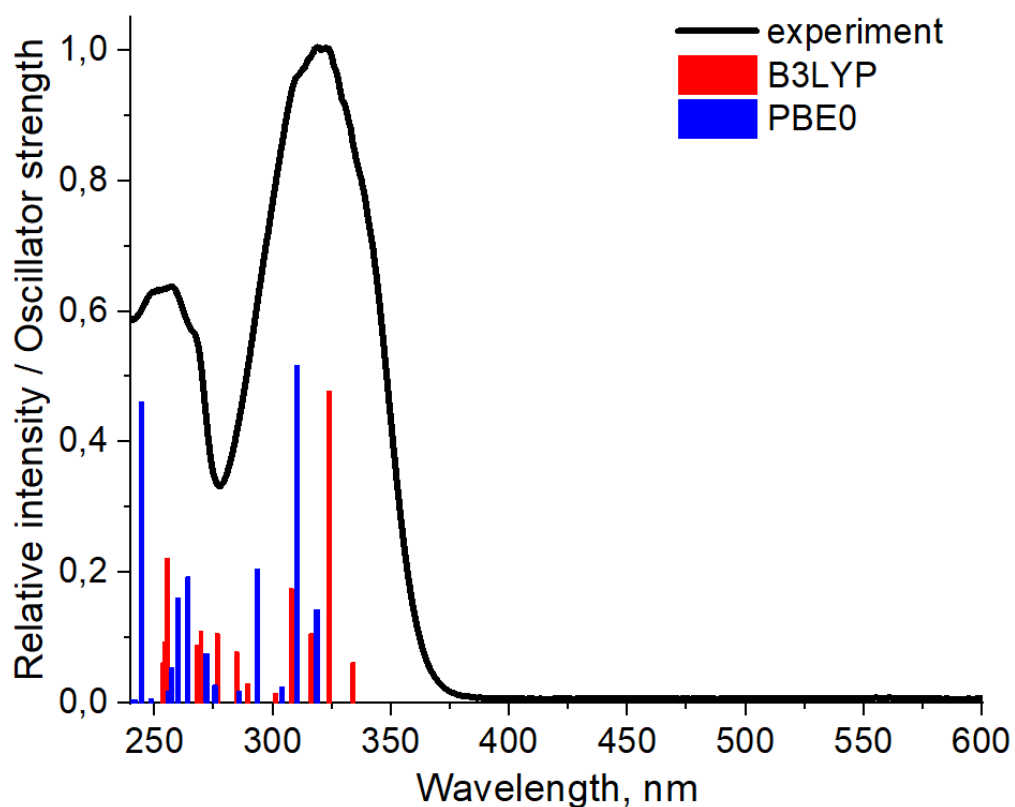

**Figure S17.** Comparison of the experimental absorption spectrum of  $HL^2$  with those computed using PBE0 and B3LYP functionals.

**Table S4.** Optimized geometry of the  $S_0$  state of HL<sup>1</sup> (enol form,  $S_0^E$ ) in Cartesian (XYZ) coordinates as calculated in Gaussian at the B3LYP/6-31+g(d) level of theory in MeCN continuum solvation model.

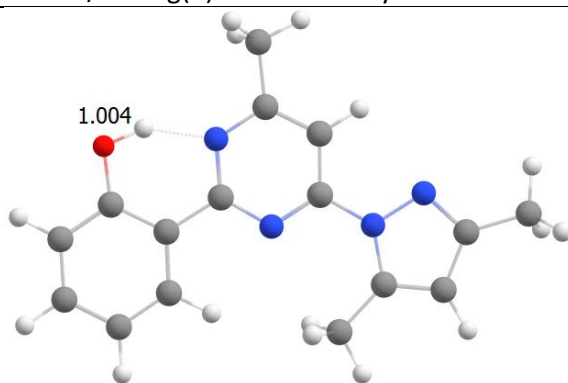

|   |                 |                 |                 |
|---|-----------------|-----------------|-----------------|
| O | 6.453660000000  | 5.076798000000  | 5.112313000000  |
| H | 6.001742000000  | 4.312322000000  | 5.580919000000  |
| N | 7.753639000000  | 2.659857000000  | 8.393390000000  |
| N | 7.504897000000  | 0.943068000000  | 9.951920000000  |
| N | 6.734591000000  | -0.076854000000 | 10.467048000000 |
| N | 6.063285000000  | 3.143414000000  | 6.793488000000  |
| C | 6.994931000000  | 1.679643000000  | 8.876495000000  |
| C | 8.713372000000  | 1.063799000000  | 10.626643000000 |
| C | 7.262969000000  | 3.366342000000  | 7.360956000000  |
| C | 9.353741000000  | 4.729612000000  | 7.371366000000  |
| H | 9.683439000000  | 4.117532000000  | 8.202378000000  |
| C | 7.650141000000  | 5.255843000000  | 5.721137000000  |
| C | 7.448439000000  | -0.594676000000 | 11.456118000000 |
| C | 8.089586000000  | 4.457514000000  | 6.811274000000  |
| C | 8.692230000000  | 0.085213000000  | 11.593807000000 |
| H | 9.475803000000  | -0.115762000000 | 12.311490000000 |
| C | 9.791355000000  | 2.057034000000  | 10.341048000000 |
| H | 10.176739000000 | 1.955005000000  | 9.322611000000  |
| H | 10.609463000000 | 1.890784000000  | 11.047657000000 |
| H | 9.433847000000  | 3.085004000000  | 10.448448000000 |
| C | 5.293689000000  | 2.148838000000  | 7.283837000000  |
| C | 5.728548000000  | 1.373075000000  | 8.348817000000  |
| H | 5.129590000000  | 0.572351000000  | 8.756993000000  |
| C | 9.715495000000  | 6.527031000000  | 5.807312000000  |
| H | 10.338435000000 | 7.326736000000  | 5.415868000000  |
| C | 10.163792000000 | 5.747207000000  | 6.884682000000  |
| H | 11.133655000000 | 5.935360000000  | 7.334998000000  |
| C | 6.929680000000  | -1.741510000000 | 12.264177000000 |
| H | 6.856714000000  | -1.471576000000 | 13.324236000000 |
| H | 7.601177000000  | -2.605213000000 | 12.193298000000 |
| H | 5.938694000000  | -2.040623000000 | 11.911646000000 |
| C | 8.473271000000  | 6.283361000000  | 5.233114000000  |
| H | 8.112470000000  | 6.877914000000  | 4.399119000000  |
| C | 3.963886000000  | 1.934132000000  | 6.622682000000  |
| H | 3.358627000000  | 2.845316000000  | 6.690654000000  |
| H | 3.415704000000  | 1.109957000000  | 7.085066000000  |
| H | 4.104155000000  | 1.714293000000  | 5.558185000000  |

**Table S5.** Optimized geometry of the  $S_0$  state of HL<sup>1</sup> (enol form,  $S_0^E$ ) in Cartesian (XYZ) coordinates as calculated in Gaussian at the B3LYP/6-31+g(d) level of theory in the gas phase.

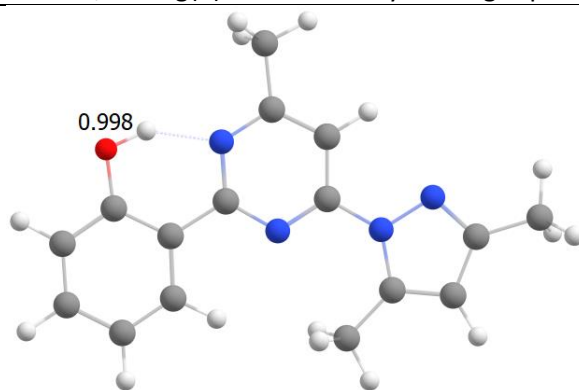

|   |                 |                 |                 |
|---|-----------------|-----------------|-----------------|
| O | 6.459257000000  | 5.086982000000  | 5.107273000000  |
| H | 5.998883000000  | 4.328911000000  | 5.564049000000  |
| N | 7.755256000000  | 2.660049000000  | 8.394040000000  |
| N | 7.509791000000  | 0.943339000000  | 9.953698000000  |
| N | 6.738884000000  | -0.074024000000 | 10.465825000000 |
| N | 6.061147000000  | 3.140214000000  | 6.796452000000  |
| C | 6.999266000000  | 1.680794000000  | 8.877914000000  |
| C | 8.717234000000  | 1.064184000000  | 10.627532000000 |
| C | 7.263276000000  | 3.368371000000  | 7.359626000000  |
| C | 9.351926000000  | 4.728378000000  | 7.371732000000  |
| H | 9.678773000000  | 4.114552000000  | 8.202334000000  |
| C | 7.648269000000  | 5.256970000000  | 5.719839000000  |
| C | 7.449662000000  | -0.593031000000 | 11.453874000000 |
| C | 8.087345000000  | 4.457414000000  | 6.810568000000  |
| C | 8.694844000000  | 0.085091000000  | 11.593972000000 |
| H | 9.478132000000  | -0.116746000000 | 12.311969000000 |
| C | 9.792402000000  | 2.059616000000  | 10.338009000000 |
| H | 10.173713000000 | 1.958392000000  | 9.317777000000  |
| H | 10.614261000000 | 1.897636000000  | 11.042117000000 |
| H | 9.431894000000  | 3.086957000000  | 10.443221000000 |
| C | 5.297326000000  | 2.145290000000  | 7.290891000000  |
| C | 5.731732000000  | 1.369359000000  | 8.355136000000  |
| H | 5.140496000000  | 0.566332000000  | 8.770854000000  |
| C | 9.714958000000  | 6.524821000000  | 5.809882000000  |
| H | 10.339809000000 | 7.324209000000  | 5.419990000000  |
| C | 10.162448000000 | 5.743923000000  | 6.887411000000  |
| H | 11.132329000000 | 5.931157000000  | 7.338420000000  |
| C | 6.923572000000  | -1.740055000000 | 12.257008000000 |
| H | 6.843875000000  | -1.474192000000 | 13.318037000000 |
| H | 7.589042000000  | -2.608864000000 | 12.185599000000 |
| H | 5.933211000000  | -2.029709000000 | 11.895538000000 |
| C | 8.475319000000  | 6.284133000000  | 5.234799000000  |
| H | 8.111121000000  | 6.876417000000  | 4.401229000000  |
| C | 3.965545000000  | 1.928895000000  | 6.630728000000  |
| H | 3.359089000000  | 2.839514000000  | 6.697703000000  |
| H | 3.417523000000  | 1.104380000000  | 7.094196000000  |
| H | 4.103844000000  | 1.708479000000  | 5.565948000000  |

**Table S6.** Optimized geometry of the  $S_1$  state of HL<sup>1</sup> (keto form,  $S_1^k$ ) in Cartesian (XYZ) coordinates as calculated in Gaussian at the B3LYP/6-31+g(d) level of theory in the gas phase.

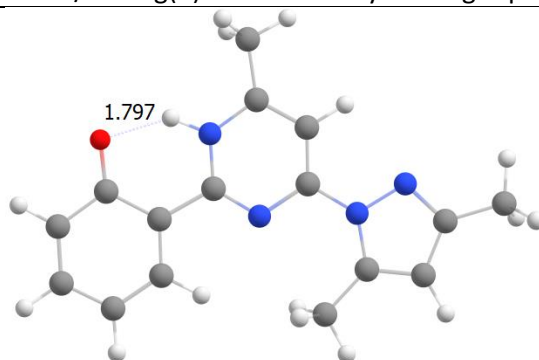

|   |                 |                 |                 |
|---|-----------------|-----------------|-----------------|
| O | 6.494866000000  | 5.100385000000  | 5.091247000000  |
| H | 5.847707000000  | 3.727248000000  | 6.052380000000  |
| N | 7.787983000000  | 2.671516000000  | 8.397275000000  |
| N | 7.493934000000  | 0.914682000000  | 9.970281000000  |
| N | 6.733899000000  | -0.104655000000 | 10.492928000000 |
| N | 6.100017000000  | 3.113541000000  | 6.838740000000  |
| C | 6.969538000000  | 1.636870000000  | 8.897963000000  |
| C | 8.700558000000  | 1.043320000000  | 10.638446000000 |
| C | 7.295658000000  | 3.345573000000  | 7.394343000000  |
| C | 9.322662000000  | 4.747104000000  | 7.329130000000  |
| H | 9.657659000000  | 4.141301000000  | 8.163038000000  |
| C | 7.612601000000  | 5.273277000000  | 5.660599000000  |
| C | 7.453742000000  | -0.617575000000 | 11.484435000000 |
| C | 8.092260000000  | 4.475440000000  | 6.784369000000  |
| C | 8.689759000000  | 0.064627000000  | 11.615398000000 |
| H | 9.478971000000  | -0.127126000000 | 12.329671000000 |
| C | 9.786484000000  | 2.034881000000  | 10.359158000000 |
| H | 10.181909000000 | 1.933499000000  | 9.344993000000  |
| H | 10.598876000000 | 1.859452000000  | 11.071884000000 |
| H | 9.438267000000  | 3.065121000000  | 10.471321000000 |
| C | 5.246903000000  | 2.099546000000  | 7.295453000000  |
| C | 5.731130000000  | 1.349771000000  | 8.369489000000  |
| H | 5.139980000000  | 0.545701000000  | 8.788297000000  |
| C | 9.730452000000  | 6.570211000000  | 5.761598000000  |
| H | 10.363188000000 | 7.366427000000  | 5.379502000000  |
| C | 10.157282000000 | 5.786613000000  | 6.835984000000  |
| H | 11.121915000000 | 5.961882000000  | 7.300954000000  |
| C | 6.929373000000  | -1.764095000000 | 12.290731000000 |
| H | 6.846642000000  | -1.498129000000 | 13.351749000000 |
| H | 7.593686000000  | -2.634324000000 | 12.222045000000 |
| H | 5.939284000000  | -2.054992000000 | 11.928606000000 |
| C | 8.494813000000  | 6.325069000000  | 5.186795000000  |
| H | 8.126718000000  | 6.911078000000  | 4.350789000000  |
| C | 3.939603000000  | 1.931010000000  | 6.603809000000  |
| H | 3.315188000000  | 2.835873000000  | 6.665932000000  |
| H | 3.380397000000  | 1.109107000000  | 7.059693000000  |
| H | 4.060500000000  | 1.700856000000  | 5.533818000000  |

**Table S7.** Optimized geometry of the  $S_2$  state of HL<sup>1</sup> (keto form,  $S_2^k$ ) in Cartesian (XYZ) coordinates as calculated in Gaussian at the B3LYP/6-31+g(d) level of theory in the gas phase.

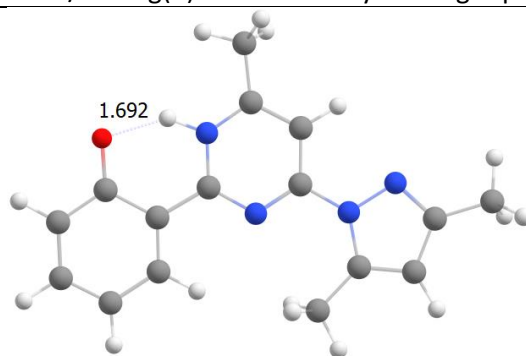

|   |                 |                 |                 |
|---|-----------------|-----------------|-----------------|
| O | 6.568009000000  | 4.891750000000  | 5.029478000000  |
| H | 5.859405000000  | 3.729178000000  | 6.034465000000  |
| N | 7.782064000000  | 2.632656000000  | 8.411703000000  |
| N | 7.516383000000  | 0.916948000000  | 9.950136000000  |
| N | 6.736190000000  | -0.096175000000 | 10.460629000000 |
| N | 6.064886000000  | 3.128351000000  | 6.867260000000  |
| C | 7.004508000000  | 1.671363000000  | 8.894156000000  |
| C | 8.736902000000  | 1.009461000000  | 10.611894000000 |
| C | 7.301518000000  | 3.373213000000  | 7.390038000000  |
| C | 9.274921000000  | 4.861498000000  | 7.431565000000  |
| H | 9.585592000000  | 4.335745000000  | 8.328655000000  |
| C | 7.664777000000  | 5.194754000000  | 5.633344000000  |
| C | 7.452925000000  | -0.638859000000 | 11.432580000000 |
| C | 8.103694000000  | 4.485133000000  | 6.820805000000  |
| C | 8.710431000000  | 0.018428000000  | 11.565016000000 |
| H | 9.499627000000  | -0.205429000000 | 12.270121000000 |
| C | 9.819847000000  | 1.994564000000  | 10.322330000000 |
| H | 10.178689000000 | 1.911368000000  | 9.292045000000  |
| H | 10.652322000000 | 1.808975000000  | 11.008136000000 |
| H | 9.472805000000  | 3.024228000000  | 10.455073000000 |
| C | 5.257400000000  | 2.155451000000  | 7.319811000000  |
| C | 5.707374000000  | 1.375859000000  | 8.398461000000  |
| H | 5.108712000000  | 0.587575000000  | 8.826692000000  |
| C | 9.706411000000  | 6.606785000000  | 5.791547000000  |
| H | 10.312266000000 | 7.412929000000  | 5.387512000000  |
| C | 10.102662000000 | 5.924853000000  | 6.921663000000  |
| H | 11.027434000000 | 6.168362000000  | 7.434828000000  |
| C | 6.920040000000  | -1.788657000000 | 12.226929000000 |
| H | 6.856046000000  | -1.536847000000 | 13.292657000000 |
| H | 7.571089000000  | -2.666803000000 | 12.136224000000 |
| H | 5.921277000000  | -2.058587000000 | 11.873184000000 |
| C | 8.497830000000  | 6.248970000000  | 5.153397000000  |
| H | 8.164910000000  | 6.762249000000  | 4.256416000000  |
| C | 3.938894000000  | 1.948815000000  | 6.647451000000  |
| H | 3.755014000000  | 2.703568000000  | 5.877424000000  |
| H | 3.123903000000  | 1.991685000000  | 7.381264000000  |
| H | 3.897650000000  | 0.956727000000  | 6.177951000000  |

**Table S8.** Optimized geometry of the  $T_1$  state of HL<sup>1</sup> (enol form,  $T_1^E$ ) in Cartesian (XYZ) coordinates as calculated in Gaussian at the B3LYP/6-31+g(d) level of theory in the gas phase.

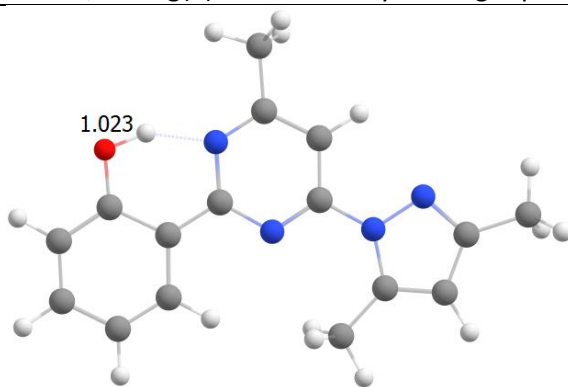

|   |                 |                 |                 |
|---|-----------------|-----------------|-----------------|
| O | 6.441606000000  | 5.080399000000  | 5.137685000000  |
| H | 6.012162000000  | 4.294075000000  | 5.632431000000  |
| N | 7.792846000000  | 2.663250000000  | 8.418465000000  |
| N | 7.533286000000  | 0.934879000000  | 9.956061000000  |
| N | 6.752004000000  | -0.082663000000 | 10.448304000000 |
| N | 6.053906000000  | 3.154718000000  | 6.786914000000  |
| C | 7.039816000000  | 1.693803000000  | 8.880635000000  |
| C | 8.732740000000  | 1.040192000000  | 10.640574000000 |
| C | 7.295619000000  | 3.398689000000  | 7.363722000000  |
| C | 9.371675000000  | 4.763066000000  | 7.382344000000  |
| H | 9.732274000000  | 4.166021000000  | 8.209860000000  |
| C | 7.625812000000  | 5.298469000000  | 5.702905000000  |
| C | 7.450851000000  | -0.618817000000 | 11.437912000000 |
| C | 8.079244000000  | 4.447206000000  | 6.843243000000  |
| C | 8.697307000000  | 0.049100000000  | 11.597104000000 |
| H | 9.473543000000  | -0.165140000000 | 12.319362000000 |
| C | 9.813057000000  | 2.034426000000  | 10.368179000000 |
| H | 10.198083000000 | 1.943050000000  | 9.347989000000  |
| H | 10.631115000000 | 1.863521000000  | 11.074909000000 |
| H | 9.453760000000  | 3.061911000000  | 10.480068000000 |
| C | 5.311886000000  | 2.173784000000  | 7.267731000000  |
| C | 5.759216000000  | 1.378360000000  | 8.348669000000  |
| H | 5.168426000000  | 0.571808000000  | 8.756748000000  |
| C | 9.671172000000  | 6.595066000000  | 5.769316000000  |
| H | 10.294718000000 | 7.396368000000  | 5.388342000000  |
| C | 10.126627000000 | 5.787308000000  | 6.867530000000  |
| H | 11.100777000000 | 5.996239000000  | 7.302739000000  |
| C | 6.908338000000  | -1.772285000000 | 12.221490000000 |
| H | 6.818339000000  | -1.520207000000 | 13.285175000000 |
| H | 7.567022000000  | -2.646090000000 | 12.146140000000 |
| H | 5.919598000000  | -2.049639000000 | 11.845731000000 |
| C | 8.428734000000  | 6.332910000000  | 5.209701000000  |
| H | 8.041265000000  | 6.914812000000  | 4.379234000000  |
| C | 3.970935000000  | 1.916899000000  | 6.638504000000  |
| H | 3.787603000000  | 2.619618000000  | 5.822198000000  |
| H | 3.170763000000  | 2.018884000000  | 7.381790000000  |
| H | 3.919321000000  | 0.894144000000  | 6.245483000000  |

**Table S9.** Optimized geometry of the  $T_1$  state of HL<sup>1</sup> (keto form,  $T_1^K$ ) in Cartesian (XYZ) coordinates as calculated in Gaussian at the B3LYP/6-31+g(d) level of theory in the gas phase.

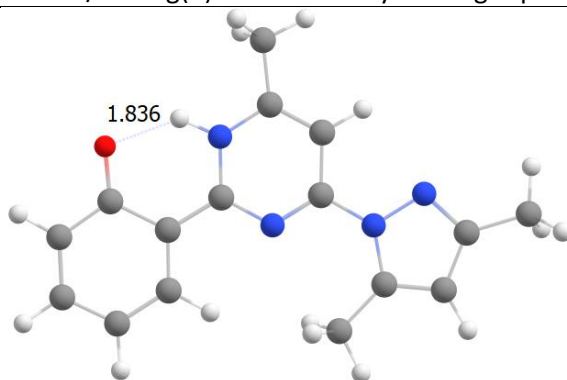

|   |                 |                 |                 |
|---|-----------------|-----------------|-----------------|
| O | 6.513518000000  | 5.094879000000  | 5.119693000000  |
| H | 5.757748000000  | 3.691417000000  | 6.030823000000  |
| N | 7.752703000000  | 2.651262000000  | 8.396060000000  |
| N | 7.514906000000  | 0.938455000000  | 9.960220000000  |
| N | 6.739326000000  | -0.075675000000 | 10.468580000000 |
| N | 6.038464000000  | 3.096386000000  | 6.814793000000  |
| C | 7.013213000000  | 1.679612000000  | 8.883384000000  |
| C | 8.717533000000  | 1.054122000000  | 10.638063000000 |
| C | 7.299242000000  | 3.381408000000  | 7.362081000000  |
| C | 9.355627000000  | 4.739261000000  | 7.357276000000  |
| H | 9.712314000000  | 4.145572000000  | 8.190288000000  |
| C | 7.642364000000  | 5.280013000000  | 5.680089000000  |
| C | 7.446295000000  | -0.599368000000 | 11.462651000000 |
| C | 8.098619000000  | 4.448663000000  | 6.817861000000  |
| C | 8.689582000000  | 0.072688000000  | 11.607456000000 |
| H | 9.470449000000  | -0.130869000000 | 12.327888000000 |
| C | 9.791727000000  | 2.048770000000  | 10.346258000000 |
| H | 10.171965000000 | 1.947262000000  | 9.324690000000  |
| H | 10.615726000000 | 1.889547000000  | 11.048844000000 |
| H | 9.431166000000  | 3.077282000000  | 10.449675000000 |
| C | 5.256933000000  | 2.091600000000  | 7.307493000000  |
| C | 5.710233000000  | 1.345197000000  | 8.357362000000  |
| H | 5.130753000000  | 0.540416000000  | 8.782697000000  |
| C | 9.749691000000  | 6.575946000000  | 5.771025000000  |
| H | 10.385757000000 | 7.369994000000  | 5.393310000000  |
| C | 10.162705000000 | 5.777860000000  | 6.846815000000  |
| H | 11.130823000000 | 5.955732000000  | 7.308461000000  |
| C | 6.908347000000  | -1.745282000000 | 12.260645000000 |
| H | 6.820693000000  | -1.482896000000 | 13.322146000000 |
| H | 7.566941000000  | -2.619877000000 | 12.192516000000 |
| H | 5.918609000000  | -2.027630000000 | 11.890992000000 |
| C | 8.505592000000  | 6.323859000000  | 5.201509000000  |
| H | 8.127931000000  | 6.905985000000  | 4.366336000000  |
| C | 3.931915000000  | 1.885566000000  | 6.638683000000  |
| H | 3.318665000000  | 2.792634000000  | 6.707769000000  |
| H | 3.389244000000  | 1.060366000000  | 7.104809000000  |
| H | 4.067085000000  | 1.659929000000  | 5.573601000000  |

**Table S10.** Optimized geometry of **HL<sup>1</sup>** near  $S_0/S_1$  conical intersection in Cartesian (XYZ) coordinates as calculated in Gaussian at the B3LYP/6-31+g(d) level of theory in the gas phase.

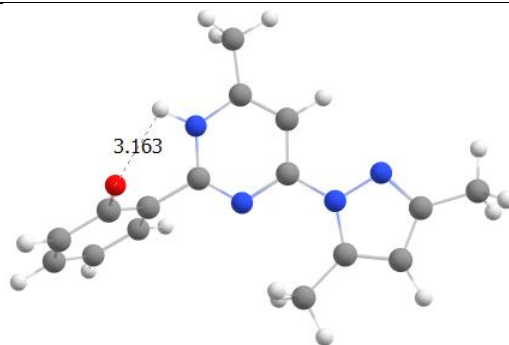

|   |                 |                 |                 |
|---|-----------------|-----------------|-----------------|
| O | 6.713953000000  | 4.745803000000  | 5.024107000000  |
| H | 5.958058000000  | 4.700374000000  | 8.094712000000  |
| N | 7.697269000000  | 2.112313000000  | 7.255488000000  |
| N | 7.301791000000  | -0.189229000000 | 7.646196000000  |
| N | 6.584367000000  | -1.166476000000 | 8.293441000000  |
| N | 6.244157000000  | 3.729353000000  | 8.133758000000  |
| C | 6.904400000000  | 1.133622000000  | 7.818569000000  |
| C | 8.333401000000  | -0.722682000000 | 6.892865000000  |
| C | 7.346514000000  | 3.345334000000  | 7.409357000000  |
| C | 9.297950000000  | 4.905862000000  | 7.533701000000  |
| H | 9.593100000000  | 4.424108000000  | 8.461627000000  |
| C | 7.774584000000  | 5.089501000000  | 5.611839000000  |
| C | 7.163121000000  | -2.315153000000 | 7.953130000000  |
| C | 8.182274000000  | 4.467162000000  | 6.862222000000  |
| C | 8.257087000000  | -2.091100000000 | 7.080858000000  |
| H | 8.910447000000  | -2.829414000000 | 6.636231000000  |
| C | 9.294626000000  | 0.045928000000  | 6.043646000000  |
| H | 8.781486000000  | 0.636481000000  | 5.279163000000  |
| H | 9.963676000000  | -0.665676000000 | 5.549440000000  |
| H | 9.894779000000  | 0.745687000000  | 6.631711000000  |
| C | 5.397065000000  | 2.771137000000  | 8.710815000000  |
| C | 5.748984000000  | 1.454318000000  | 8.558503000000  |
| H | 5.150253000000  | 0.663942000000  | 8.990236000000  |
| C | 9.735634000000  | 6.573093000000  | 5.804661000000  |
| H | 10.351605000000 | 7.377749000000  | 5.412121000000  |
| C | 10.090502000000 | 5.956475000000  | 7.013989000000  |
| H | 10.978363000000 | 6.274721000000  | 7.550687000000  |
| C | 6.640119000000  | -3.613840000000 | 8.481748000000  |
| H | 7.407252000000  | -4.146461000000 | 9.057210000000  |
| H | 6.323927000000  | -4.276004000000 | 7.666294000000  |
| H | 5.780820000000  | -3.434376000000 | 9.134144000000  |
| C | 8.607916000000  | 6.164847000000  | 5.115745000000  |
| H | 8.310583000000  | 6.627129000000  | 4.180038000000  |
| C | 4.201559000000  | 3.287464000000  | 9.441879000000  |
| H | 4.489478000000  | 3.938591000000  | 10.280163000000 |
| H | 3.614899000000  | 2.457285000000  | 9.842578000000  |
| H | 3.549546000000  | 3.876192000000  | 8.780173000000  |



**Table S11.** Optimized geometry of the  $S_0$  state of HL<sup>2</sup> (enol form,  $S_0^E$ ) in Cartesian (XYZ) coordinates as calculated in Gaussian at the B3LYP/6-31+g(d) level of theory in MeCN continuum solvation model.

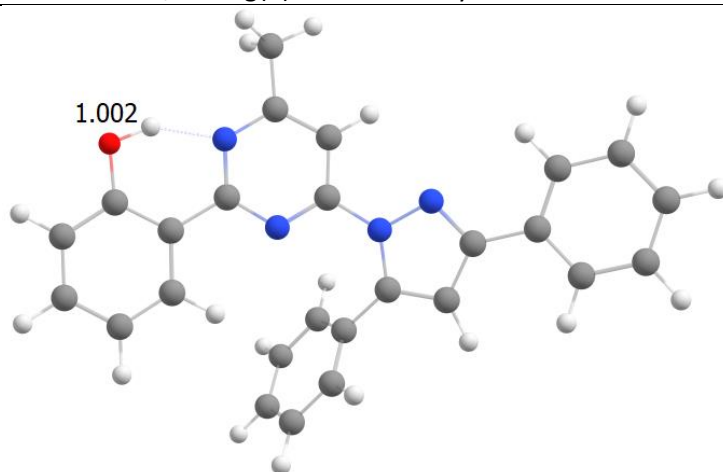

|   |                 |                 |                 |
|---|-----------------|-----------------|-----------------|
| N | -1.118332000000 | -0.427285000000 | -0.125682000000 |
| O | -4.816718000000 | -2.563633000000 | -0.225090000000 |
| H | -3.892770000000 | -2.879249000000 | -0.000194000000 |
| N | 1.170516000000  | -0.207631000000 | 0.208692000000  |
| N | -2.247882000000 | -2.489327000000 | 0.205714000000  |
| N | 2.388782000000  | -0.805975000000 | 0.058853000000  |
| C | 0.020060000000  | -1.016930000000 | 0.213339000000  |
| C | -2.231247000000 | -1.176523000000 | -0.096902000000 |
| C | 3.266755000000  | 0.191098000000  | -0.049688000000 |
| C | 0.160567000000  | 2.118344000000  | 0.450198000000  |
| C | -1.083776000000 | -3.093552000000 | 0.520400000000  |
| C | 1.267042000000  | 1.175999000000  | 0.205299000000  |
| C | -3.508035000000 | -0.516675000000 | -0.418953000000 |
| C | 0.106742000000  | -2.374093000000 | 0.549395000000  |
| H | 1.049158000000  | -2.832142000000 | 0.815437000000  |
| C | 4.702897000000  | -0.075061000000 | -0.222580000000 |
| C | -0.077633000000 | 3.157965000000  | -0.458745000000 |
| H | 0.527486000000  | 3.230667000000  | -1.357842000000 |
| C | 2.606138000000  | 1.452300000000  | 0.032443000000  |
| H | 3.045874000000  | 2.438799000000  | 0.026693000000  |
| C | -3.528147000000 | 0.869468000000  | -0.675304000000 |
| H | -2.591449000000 | 1.411532000000  | -0.622291000000 |
| C | 5.215317000000  | -1.376170000000 | -0.074045000000 |
| H | 4.539006000000  | -2.186922000000 | 0.176869000000  |
| C | -0.627460000000 | 2.024975000000  | 1.608489000000  |
| H | -0.443280000000 | 1.226065000000  | 2.320640000000  |
| C | -4.732983000000 | -1.232903000000 | -0.467495000000 |
| C | -1.101510000000 | 4.080574000000  | -0.223488000000 |
| H | -1.284295000000 | 4.875432000000  | -0.941143000000 |
| C | -1.889677000000 | 3.975576000000  | 0.924697000000  |
| H | -2.689345000000 | 4.688391000000  | 1.105025000000  |
| C | -1.144176000000 | -4.557464000000 | 0.843097000000  |
| H | -1.830535000000 | -4.731357000000 | 1.679374000000  |
| H | -0.158692000000 | -4.949708000000 | 1.104783000000  |
| H | -1.530229000000 | -5.115251000000 | -0.017836000000 |
| C | -1.646538000000 | 2.946211000000  | 1.841853000000  |
| H | -2.254102000000 | 2.860630000000  | 2.738365000000  |
| C | -4.709421000000 | 1.533941000000  | -0.976276000000 |

|   |                 |                 |                 |
|---|-----------------|-----------------|-----------------|
| H | -4.699458000000 | 2.603089000000  | -1.165206000000 |
| C | -5.923113000000 | -0.556105000000 | -0.777024000000 |
| H | -6.846325000000 | -1.126872000000 | -0.810564000000 |
| C | 6.576913000000  | -1.624400000000 | -0.242772000000 |
| H | 6.957782000000  | -2.635069000000 | -0.123679000000 |
| C | -5.911704000000 | 0.811513000000  | -1.028932000000 |
| H | -6.843325000000 | 1.319106000000  | -1.264184000000 |
| C | 5.587576000000  | 0.968611000000  | -0.540948000000 |
| H | 5.211429000000  | 1.979200000000  | -0.667377000000 |
| C | 7.451439000000  | -0.578425000000 | -0.559578000000 |
| H | 8.512388000000  | -0.773020000000 | -0.689073000000 |
| C | 6.950981000000  | 0.718410000000  | -0.707328000000 |
| H | 7.620796000000  | 1.537164000000  | -0.955040000000 |

**Table S12.** Optimized geometry of the  $S_0$  state of HL<sup>2</sup> (enol form,  $S_0^E$ ) in Cartesian (XYZ) coordinates as calculated in Gaussian at the B3LYP/6-31+g(d) level of theory in the gas phase.

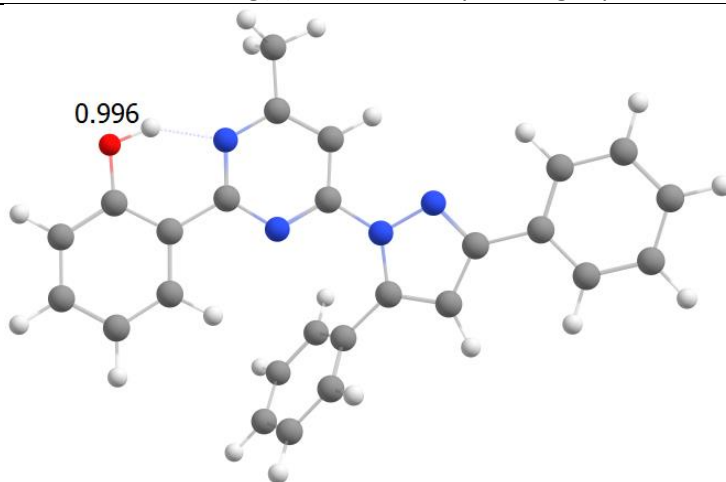

|   |                 |                 |                 |
|---|-----------------|-----------------|-----------------|
| N | -1.127404000000 | -0.431868000000 | -0.093719000000 |
| O | -4.835594000000 | -2.572101000000 | -0.128404000000 |
| H | -3.912271000000 | -2.906047000000 | 0.037630000000  |
| N | 1.167940000000  | -0.204128000000 | 0.189900000000  |
| N | -2.230129000000 | -2.519234000000 | 0.168401000000  |
| N | 2.390768000000  | -0.798438000000 | 0.071368000000  |
| C | 0.024085000000  | -1.022283000000 | 0.183866000000  |
| C | -2.235393000000 | -1.193335000000 | -0.080799000000 |
| C | 3.267243000000  | 0.197729000000  | -0.034016000000 |
| C | 0.150316000000  | 2.131190000000  | 0.369280000000  |
| C | -1.051661000000 | -3.119335000000 | 0.426627000000  |
| C | 1.259038000000  | 1.180468000000  | 0.169573000000  |
| C | -3.518899000000 | -0.532886000000 | -0.355442000000 |
| C | 0.134362000000  | -2.394751000000 | 0.452685000000  |
| H | 1.091956000000  | -2.850601000000 | 0.662056000000  |
| C | 4.705658000000  | -0.068149000000 | -0.180704000000 |
| C | -0.077285000000 | 3.135761000000  | -0.579666000000 |
| H | 0.529641000000  | 3.164828000000  | -1.480086000000 |
| C | 2.599872000000  | 1.457649000000  | 0.019869000000  |
| H | 3.032606000000  | 2.446992000000  | 0.006300000000  |
| C | -3.541335000000 | 0.854258000000  | -0.610235000000 |
| H | -2.599633000000 | 1.389069000000  | -0.599983000000 |
| C | 5.193064000000  | -1.386149000000 | -0.171303000000 |
| H | 4.490907000000  | -2.204832000000 | -0.053945000000 |

|   |                 |                 |                 |
|---|-----------------|-----------------|-----------------|
| C | -0.643904000000 | 2.089721000000  | 1.525491000000  |
| H | -0.470293000000 | 1.314933000000  | 2.266399000000  |
| C | -4.747922000000 | -1.245776000000 | -0.362634000000 |
| C | -1.093299000000 | 4.075566000000  | -0.384379000000 |
| H | -1.267041000000 | 4.843311000000  | -1.133439000000 |
| C | -1.885267000000 | 4.022474000000  | 0.763423000000  |
| H | -2.679597000000 | 4.748288000000  | 0.913805000000  |
| C | -1.092158000000 | -4.598028000000 | 0.688818000000  |
| H | -1.748013000000 | -4.812987000000 | 1.540146000000  |
| H | -0.095910000000 | -4.995748000000 | 0.899561000000  |
| H | -1.505693000000 | -5.122543000000 | -0.180289000000 |
| C | -1.655672000000 | 3.026495000000  | 1.718980000000  |
| H | -2.270783000000 | 2.977672000000  | 2.613028000000  |
| C | -4.728506000000 | 1.524063000000  | -0.862668000000 |
| H | -4.719077000000 | 2.592900000000  | -1.053734000000 |
| C | -5.945497000000 | -0.559159000000 | -0.620765000000 |
| H | -6.868885000000 | -1.129861000000 | -0.619918000000 |
| C | 6.556055000000  | -1.637287000000 | -0.311890000000 |
| H | 6.917420000000  | -2.662199000000 | -0.302845000000 |
| C | -5.935652000000 | 0.807336000000  | -0.867300000000 |
| H | -6.873301000000 | 1.320851000000  | -1.064497000000 |
| C | 5.617369000000  | 0.987841000000  | -0.334911000000 |
| H | 5.261872000000  | 2.013814000000  | -0.348591000000 |
| C | 7.457770000000  | -0.578628000000 | -0.463854000000 |
| H | 8.520603000000  | -0.776288000000 | -0.572941000000 |
| C | 6.982357000000  | 0.734595000000  | -0.474696000000 |
| H | 7.673583000000  | 1.564653000000  | -0.593180000000 |

**Table S13.** Optimized geometry of the  $S_1$  state of HL<sup>2</sup> (keto form,  $S_1^K$ ) in Cartesian (XYZ) coordinates as calculated in Gaussian at the B3LYP/6-31+g(d) level of theory in the gas phase.

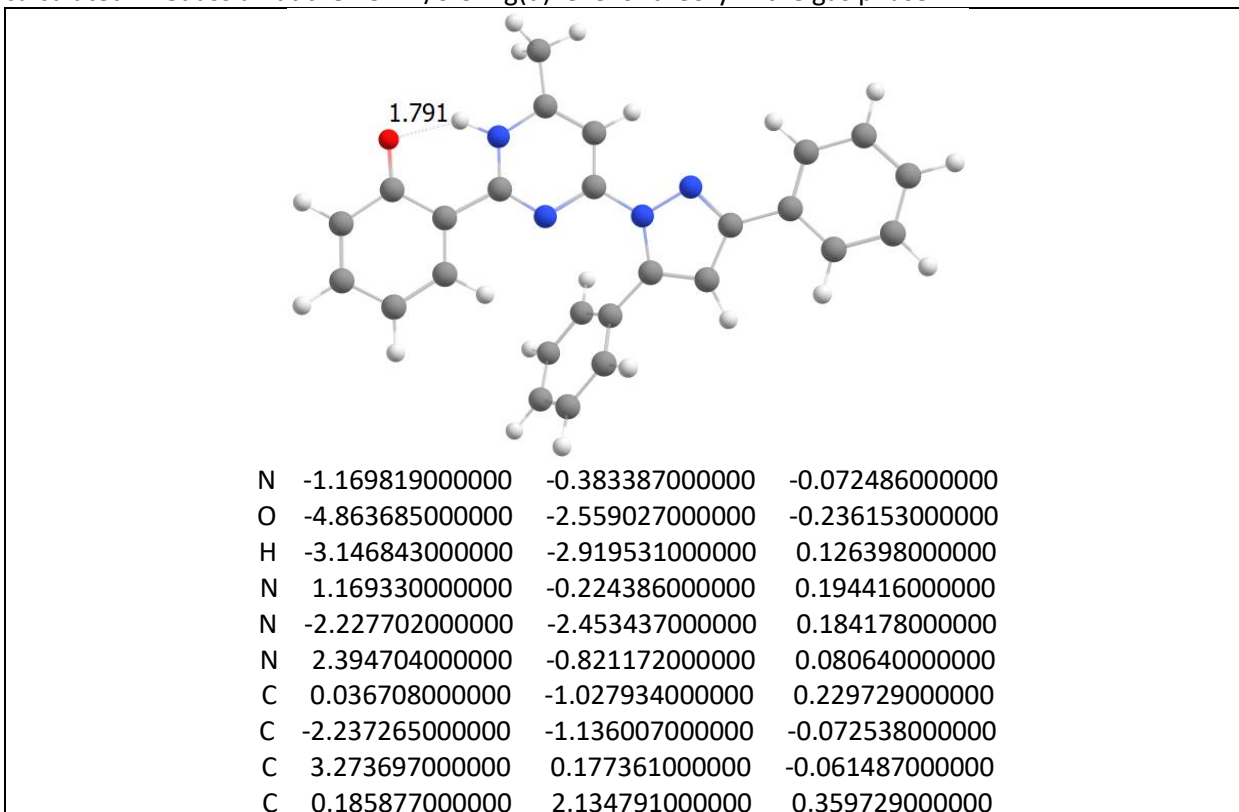

|   |                 |                 |                 |
|---|-----------------|-----------------|-----------------|
| C | -1.052635000000 | -3.145831000000 | 0.472034000000  |
| C | 1.265179000000  | 1.162324000000  | 0.131037000000  |
| C | -3.577541000000 | -0.526913000000 | -0.362175000000 |
| C | 0.112785000000  | -2.381568000000 | 0.492686000000  |
| H | 1.069712000000  | -2.841550000000 | 0.704540000000  |
| C | 4.708615000000  | -0.096340000000 | -0.204045000000 |
| C | 0.042007000000  | 3.221747000000  | -0.514941000000 |
| H | 0.681913000000  | 3.284946000000  | -1.390541000000 |
| C | 2.611271000000  | 1.432363000000  | -0.047750000000 |
| H | 3.046847000000  | 2.419646000000  | -0.090316000000 |
| C | -3.615732000000 | 0.832696000000  | -0.565663000000 |
| H | -2.687262000000 | 1.389619000000  | -0.514693000000 |
| C | 5.198904000000  | -1.410927000000 | -0.109438000000 |
| H | 4.497853000000  | -2.218992000000 | 0.070908000000  |
| C | -0.654918000000 | 2.054383000000  | 1.482269000000  |
| H | -0.544581000000 | 1.224257000000  | 2.172627000000  |
| C | -4.807523000000 | -1.306022000000 | -0.417699000000 |
| C | -0.928514000000 | 4.199258000000  | -0.283054000000 |
| H | -1.031226000000 | 5.030405000000  | -0.975826000000 |
| C | -1.764876000000 | 4.106877000000  | 0.831899000000  |
| H | -2.518813000000 | 4.867740000000  | 1.015732000000  |
| C | -1.158421000000 | -4.607372000000 | 0.744770000000  |
| H | -1.796406000000 | -4.819198000000 | 1.615928000000  |
| H | -0.167434000000 | -5.023532000000 | 0.945277000000  |
| H | -1.587628000000 | -5.154519000000 | -0.107464000000 |
| C | -1.622188000000 | 3.030211000000  | 1.713993000000  |
| H | -2.265192000000 | 2.952153000000  | 2.586667000000  |
| C | -4.831865000000 | 1.516045000000  | -0.833666000000 |
| H | -4.814841000000 | 2.590826000000  | -0.980462000000 |
| C | -6.026435000000 | -0.568515000000 | -0.700053000000 |
| H | -6.938522000000 | -1.155239000000 | -0.742582000000 |
| C | 6.560827000000  | -1.671506000000 | -0.245605000000 |
| H | 6.922198000000  | -2.693892000000 | -0.169727000000 |
| C | -6.030917000000 | 0.802195000000  | -0.901900000000 |
| H | -6.963769000000 | 1.319427000000  | -1.108764000000 |
| C | 5.621184000000  | 0.945551000000  | -0.439330000000 |
| H | 5.264355000000  | 1.967972000000  | -0.521679000000 |
| C | 7.461756000000  | -0.626969000000 | -0.477721000000 |
| H | 8.523696000000  | -0.831859000000 | -0.582873000000 |
| C | 6.984325000000  | 0.682951000000  | -0.573729000000 |
| H | 7.674005000000  | 1.503116000000  | -0.755282000000 |

**Table S14.** Optimized geometry of the  $S_2$  state of HL<sup>2</sup> (keto form,  $S_2^k$ ) in Cartesian (XYZ) coordinates as calculated in Gaussian at the B3LYP/6-31+g(d) level of theory in the gas phase.

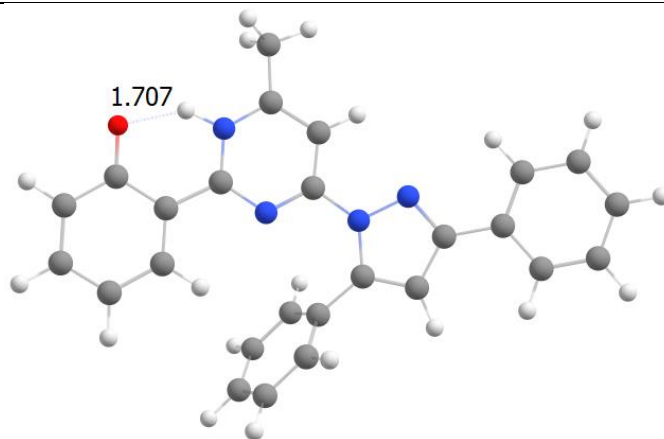

|   |                 |                 |                 |
|---|-----------------|-----------------|-----------------|
| N | 1.118715000000  | 0.409493000000  | -0.074540000000 |
| O | 4.763199000000  | 2.587153000000  | -0.099074000000 |
| H | 3.109489000000  | 2.965070000000  | 0.089605000000  |
| N | -1.167823000000 | 0.201813000000  | 0.144810000000  |
| N | 2.166987000000  | 2.511788000000  | 0.113143000000  |
| N | -2.398551000000 | 0.792514000000  | 0.067858000000  |
| C | -0.037683000000 | 1.022485000000  | 0.133149000000  |
| C | 2.234933000000  | 1.167714000000  | -0.072017000000 |
| C | -3.273333000000 | -0.207018000000 | -0.035683000000 |
| C | -0.143258000000 | -2.141838000000 | 0.273511000000  |
| C | 1.010829000000  | 3.174605000000  | 0.306206000000  |
| C | -1.256788000000 | -1.188362000000 | 0.108451000000  |
| C | 3.557317000000  | 0.530085000000  | -0.278235000000 |
| C | -0.180669000000 | 2.415570000000  | 0.326306000000  |
| H | -1.148233000000 | 2.867927000000  | 0.475312000000  |
| C | -4.712681000000 | 0.051300000000  | -0.139957000000 |
| C | 0.126078000000  | -3.077235000000 | -0.732694000000 |
| H | -0.447309000000 | -3.046533000000 | -1.654698000000 |
| C | -2.596284000000 | -1.466590000000 | -0.018029000000 |
| H | -3.025129000000 | -2.457608000000 | -0.040647000000 |
| C | 3.623456000000  | -0.828905000000 | -0.468812000000 |
| H | 2.704122000000  | -1.403595000000 | -0.472620000000 |
| C | -5.207158000000 | 1.367866000000  | -0.094922000000 |
| H | -4.505507000000 | 2.187629000000  | 0.017770000000  |
| C | 0.606494000000  | -2.177456000000 | 1.459609000000  |
| H | 0.400422000000  | -1.453751000000 | 2.242574000000  |
| C | 4.777423000000  | 1.312956000000  | -0.271393000000 |
| C | 1.136353000000  | -4.029897000000 | -0.561439000000 |
| H | 1.339159000000  | -4.746956000000 | -1.352395000000 |
| C | 1.880052000000  | -4.057332000000 | 0.618743000000  |
| H | 2.664159000000  | -4.797497000000 | 0.753995000000  |
| C | 1.071495000000  | 4.655804000000  | 0.497962000000  |
| H | 1.678333000000  | 4.922647000000  | 1.373901000000  |
| H | 0.066569000000  | 5.058950000000  | 0.644322000000  |
| H | 1.517053000000  | 5.155315000000  | -0.372787000000 |
| C | 1.610676000000  | -3.127454000000 | 1.630582000000  |
| H | 2.185665000000  | -3.143392000000 | 2.552322000000  |
| C | 4.876002000000  | -1.510225000000 | -0.654340000000 |
| H | 4.873287000000  | -2.586653000000 | -0.791272000000 |

|   |                 |                 |                 |
|---|-----------------|-----------------|-----------------|
| C | 6.007828000000  | 0.609793000000  | -0.463797000000 |
| H | 6.915899000000  | 1.204895000000  | -0.454859000000 |
| C | -6.574233000000 | 1.613999000000  | -0.194130000000 |
| H | -6.939640000000 | 2.636994000000  | -0.157406000000 |
| C | 6.052263000000  | -0.786318000000 | -0.652192000000 |
| H | 7.008750000000  | -1.282202000000 | -0.791981000000 |
| C | -5.625832000000 | -1.006523000000 | -0.287866000000 |
| H | -5.266917000000 | -2.030712000000 | -0.328540000000 |
| C | -7.476104000000 | 0.553987000000  | -0.339847000000 |
| H | -8.542377000000 | 0.748303000000  | -0.416492000000 |
| C | -6.994443000000 | -0.757147000000 | -0.386228000000 |
| H | -7.685085000000 | -1.588495000000 | -0.500052000000 |

**Table S15.** Optimized geometry of the  $T_1$  state of  $HL^2$  (enol form,  $T_1^E$ ) in Cartesian (XYZ) coordinates as calculated in Gaussian at the B3LYP/6-31+g(d) level of theory in the gas phase.

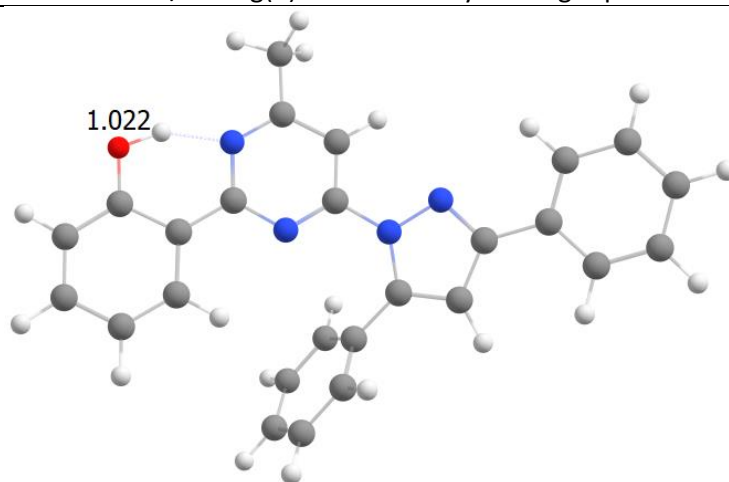

|   |                 |                 |                 |
|---|-----------------|-----------------|-----------------|
| N | -1.116122000000 | -0.393614000000 | -0.118289000000 |
| O | -4.800979000000 | -2.580057000000 | -0.130474000000 |
| H | -3.837181000000 | -2.870580000000 | 0.047692000000  |
| N | 1.171605000000  | -0.181682000000 | 0.190566000000  |
| N | -2.246617000000 | -2.522430000000 | 0.189348000000  |
| N | 2.384580000000  | -0.788945000000 | 0.062984000000  |
| C | 0.010518000000  | -0.984058000000 | 0.182423000000  |
| C | -2.256637000000 | -1.159124000000 | -0.090717000000 |
| C | 3.273766000000  | 0.198297000000  | -0.044880000000 |
| C | 0.175524000000  | 2.155272000000  | 0.381245000000  |
| C | -1.091740000000 | -3.104454000000 | 0.462781000000  |
| C | 1.277405000000  | 1.198780000000  | 0.173026000000  |
| C | -3.488067000000 | -0.530087000000 | -0.365689000000 |
| C | 0.116238000000  | -2.366387000000 | 0.487873000000  |
| H | 1.069429000000  | -2.822228000000 | 0.714238000000  |
| C | 4.708164000000  | -0.085628000000 | -0.195022000000 |
| C | -0.048909000000 | 3.168868000000  | -0.558881000000 |
| H | 0.558001000000  | 3.202649000000  | -1.459160000000 |
| C | 2.621536000000  | 1.464130000000  | 0.014755000000  |
| H | 3.064985000000  | 2.448879000000  | 0.002810000000  |
| C | -3.565265000000 | 0.873141000000  | -0.645398000000 |
| H | -2.645215000000 | 1.443163000000  | -0.639646000000 |
| C | 5.180183000000  | -1.409351000000 | -0.178549000000 |
| H | 4.468252000000  | -2.218422000000 | -0.053476000000 |
| C | -0.618976000000 | 2.108466000000  | 1.537433000000  |

|   |                 |                 |                 |
|---|-----------------|-----------------|-----------------|
| H | -0.448023000000 | 1.326467000000  | 2.271256000000  |
| C | -4.781783000000 | -1.272434000000 | -0.375931000000 |
| C | -1.060599000000 | 4.111937000000  | -0.355548000000 |
| H | -1.229554000000 | 4.888023000000  | -1.097286000000 |
| C | -1.852496000000 | 4.053256000000  | 0.792222000000  |
| H | -2.640826000000 | 4.784116000000  | 0.950933000000  |
| C | -1.087578000000 | -4.579506000000 | 0.753709000000  |
| H | -2.105010000000 | -4.977288000000 | 0.738726000000  |
| H | -0.641076000000 | -4.779200000000 | 1.735332000000  |
| H | -0.486417000000 | -5.115645000000 | 0.008925000000  |
| C | -1.625829000000 | 3.048520000000  | 1.739809000000  |
| H | -2.238312000000 | 2.996988000000  | 2.635733000000  |
| C | -4.770859000000 | 1.478316000000  | -0.897909000000 |
| H | -4.790370000000 | 2.546352000000  | -1.099639000000 |
| C | -5.990336000000 | -0.614771000000 | -0.640094000000 |
| H | -6.897906000000 | -1.210380000000 | -0.631869000000 |
| C | 6.539672000000  | -1.678148000000 | -0.321570000000 |
| H | 6.888191000000  | -2.707540000000 | -0.306692000000 |
| C | -6.011040000000 | 0.746366000000  | -0.901328000000 |
| H | -6.944314000000 | 1.259192000000  | -1.106429000000 |
| C | 5.633134000000  | 0.957527000000  | -0.359226000000 |
| H | 5.289959000000  | 1.987671000000  | -0.379088000000 |
| C | 7.454358000000  | -0.632125000000 | -0.483134000000 |
| H | 8.514408000000  | -0.843563000000 | -0.593957000000 |
| C | 6.994502000000  | 0.686676000000  | -0.501313000000 |
| H | 7.695371000000  | 1.507615000000  | -0.627392000000 |

**Table S16.** Optimized geometry of the  $T_1$  state of  $HL^2$  (keto form,  $T_1^k$ ) in Cartesian (XYZ) coordinates as calculated in Gaussian at the B3LYP/6-31+g(d) level of theory in the gas phase.

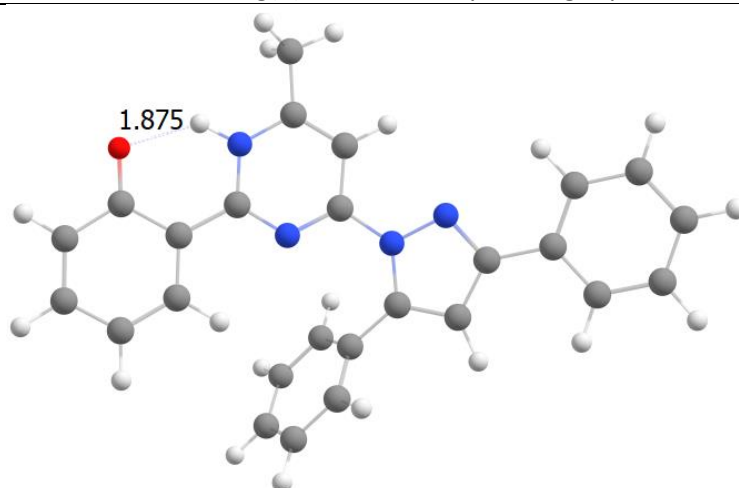

|   |                 |                 |                 |
|---|-----------------|-----------------|-----------------|
| N | -1.128987000000 | -0.450950000000 | -0.102535000000 |
| O | -4.851256000000 | -2.513209000000 | -0.176386000000 |
| H | -3.087724000000 | -3.026543000000 | 0.199064000000  |
| N | 1.172485000000  | -0.202543000000 | 0.183466000000  |
| N | -2.196552000000 | -2.529907000000 | 0.234339000000  |
| N | 2.396032000000  | -0.786390000000 | 0.049933000000  |
| C | 0.035373000000  | -1.019326000000 | 0.185960000000  |
| C | -2.238848000000 | -1.165918000000 | -0.081123000000 |
| C | 3.270682000000  | 0.222175000000  | -0.055633000000 |
| C | 0.139905000000  | 2.114028000000  | 0.403368000000  |
| C | -0.991945000000 | -3.163341000000 | 0.474176000000  |

|   |                 |                 |                 |
|---|-----------------|-----------------|-----------------|
| C | 1.255506000000  | 1.180776000000  | 0.174851000000  |
| C | -3.511554000000 | -0.524419000000 | -0.377575000000 |
| C | 0.154406000000  | -2.427212000000 | 0.462555000000  |
| H | 1.120613000000  | -2.875870000000 | 0.644477000000  |
| C | 4.707905000000  | -0.037415000000 | -0.204330000000 |
| C | -0.087528000000 | 3.159449000000  | -0.501980000000 |
| H | 0.532190000000  | 3.234490000000  | -1.391011000000 |
| C | 2.597624000000  | 1.471193000000  | 0.006118000000  |
| H | 3.023473000000  | 2.463831000000  | -0.003028000000 |
| C | -3.544101000000 | 0.843115000000  | -0.642632000000 |
| H | -2.614415000000 | 1.398922000000  | -0.623359000000 |
| C | 5.204168000000  | -1.352837000000 | -0.177582000000 |
| H | 4.506194000000  | -2.172690000000 | -0.044417000000 |
| C | -0.672939000000 | 2.016890000000  | 1.545024000000  |
| H | -0.500447000000 | 1.213067000000  | 2.254333000000  |
| C | -4.785714000000 | -1.263910000000 | -0.401073000000 |
| C | -1.115264000000 | 4.081076000000  | -0.280638000000 |
| H | -1.282449000000 | 4.882225000000  | -0.995856000000 |
| C | -1.925094000000 | 3.969801000000  | 0.850872000000  |
| H | -2.725079000000 | 4.684552000000  | 1.024636000000  |
| C | -1.059912000000 | -4.634179000000 | 0.741294000000  |
| H | -1.691843000000 | -4.842927000000 | 1.614368000000  |
| H | -0.062439000000 | -5.038481000000 | 0.927963000000  |
| H | -1.497877000000 | -5.165331000000 | -0.113913000000 |
| C | -1.697378000000 | 2.933809000000  | 1.764643000000  |
| H | -2.321067000000 | 2.841956000000  | 2.649750000000  |
| C | -4.750122000000 | 1.511378000000  | -0.921181000000 |
| H | -4.718200000000 | 2.580196000000  | -1.114512000000 |
| C | -5.994128000000 | -0.530668000000 | -0.692669000000 |
| H | -6.912632000000 | -1.109588000000 | -0.700458000000 |
| C | 6.567940000000  | -1.599817000000 | -0.320755000000 |
| H | 6.933474000000  | -2.623303000000 | -0.297658000000 |
| C | -5.980657000000 | 0.829216000000  | -0.948583000000 |
| H | -6.900709000000 | 1.363171000000  | -1.165637000000 |
| C | 5.616880000000  | 1.019267000000  | -0.379394000000 |
| H | 5.256258000000  | 2.043324000000  | -0.408354000000 |
| C | 7.465280000000  | -0.540622000000 | -0.492830000000 |
| H | 8.528621000000  | -0.734942000000 | -0.603830000000 |
| C | 6.981974000000  | 0.770174000000  | -0.521266000000 |
| H | 7.668499000000  | 1.602046000000  | -0.655604000000 |
